# Supplementary material for: Two de novo GluN2B mutations affect multiple NMDAR-functions and instigate severe pediatric encephalopathy
Source: eLife journal article supplement (doi:10.7554/elife.67555), 2021-07-02

a

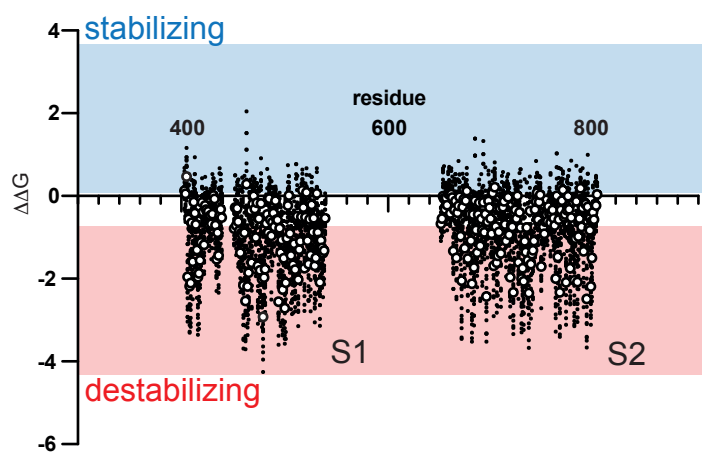

b

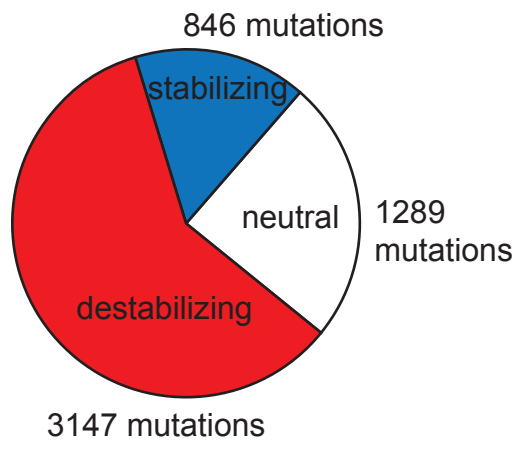

c

| Mutation | Functional output | EC <sub>50</sub> (μM) | ΔΔG    | Comment |
|----------|-------------------|-----------------------|--------|---------|
| C436R    | LOF               | 1                     | -1.505 |         |
| R696H    | GOF               | 0.33                  | -1.486 |         |
| G689C    | LOF               | 1100                  | -1.42  |         |
| G689S    | LOF               | 1800                  | -1.355 |         |
| M706V    | neither           | 1.5                   | -1.15  |         |
| E413G    | LOF               | 79                    | -1.054 |         |
| C461F    | LOF               | 169                   | -0.86  |         |
| E657G    | LOF               | 0.7                   | -0.828 |         |
| C456Y    | LOF               | 0.39                  | -0.804 |         |
| C456Y    | LOF               |                       | -0.804 |         |
| R682C    | GOF               | 0.91                  | -0.703 |         |
| I655F    | GOF               | 5.6                   | -0.641 |         |
| Q656     | LOF               |                       | -      | stop    |
| G724     | LOF               |                       | -      | stop    |
| R519     | LOF               |                       | -      | stop    |
| D786M    | LOF               |                       | -      | stop    |

d

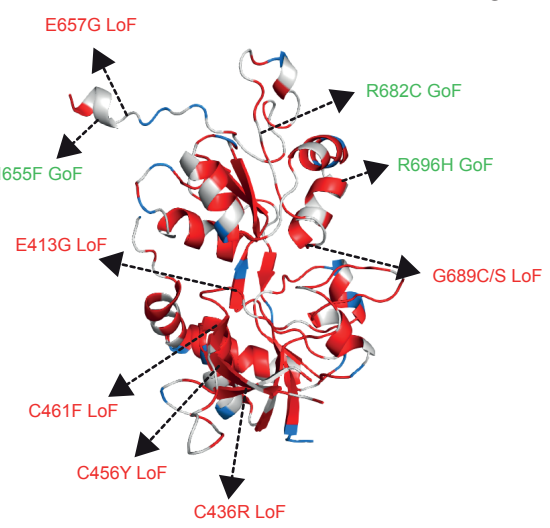

e

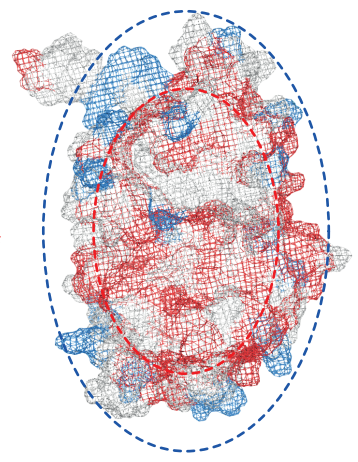

f

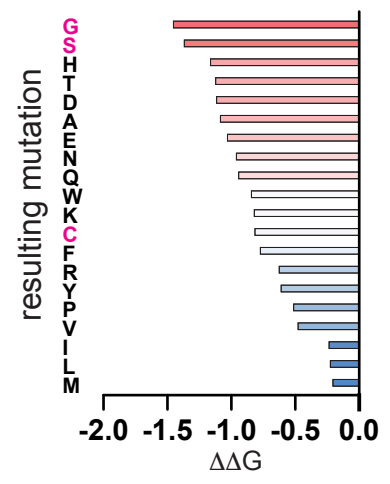

Supplement: supp [file elife-67555-supp-v1.zip]
