# Supplementary material for: Two de novo GluN2B mutations affect multiple NMDAR-functions and instigate severe pediatric encephalopathy
Source: eLife journal article supplement (doi:10.7554/elife.67555), 2021-07-02
Supplement: supp [file elife-67555-supp-v1.zip]

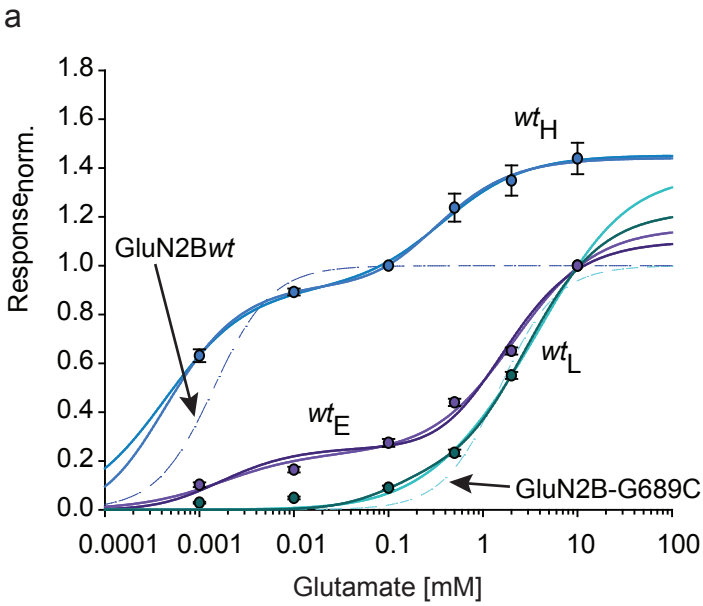

- $wt_H$  two site saturation (Eq. 2)
- $wt_H$  two site saturation (Eq. 3)
- $wt_E$  two site saturation (Eq. 2)
- $wt_E$  two site saturation (Eq. 3)
- $wt_L$  two site saturation (Eq. 2)
- $wt_L$  two site saturation (Eq. 3)

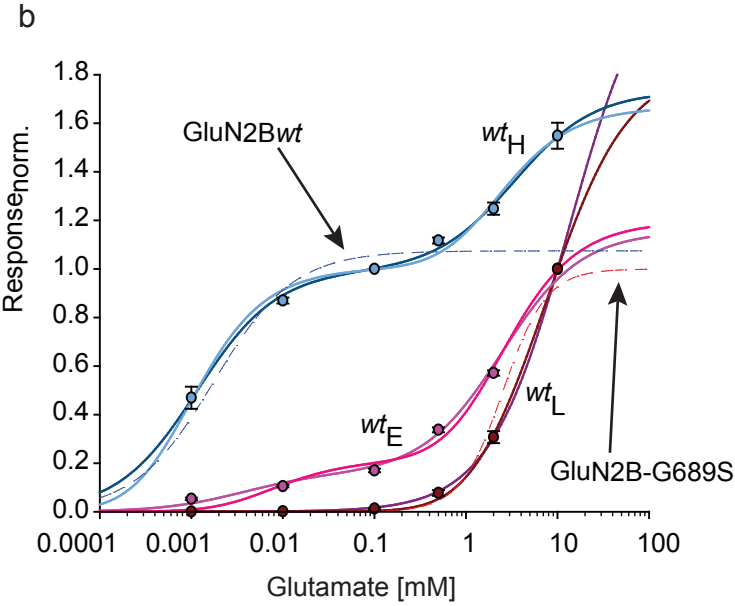

- $wt_H$  two site saturation (Eq. 2)
- $wt_H$  two site saturation (Eq. 3)
- $wt_E$  two site saturation (Eq. 2)
- $wt_E$  two site saturation (Eq. 3)
- $wt_L$  two site saturation (Eq. 2)
- $wt_L$  two site saturation (Eq. 3)
