# Supplementary material for: Two de novo GluN2B mutations affect multiple NMDAR-functions and instigate severe pediatric encephalopathy
Source: eLife. 2021 Jul 2;10:e67555. doi: 10.7554/eLife.67555 (PMC8260228; doi:10.7554/eLife.67555)
Supplement: Supplementary file 2. — >500 published and unpublished variants found in GRIN2B patients. Search was performed in PubMed, ClinVar and CFERV databases. [file elife-67555-supp2.xlsx]

## Sheet: ClinVar - filtered
Name	Gene(s)	Protein change	Condition(s)	Clinical significance (Last reviewed)	Review status	Accession	GRCh37Chromosome	GRCh37Location	GRCh38Chromosome	GRCh38Location	VariationID	AlleleID(s)	dbSNP ID			number of different residues with mutation	350
NM_000834.5(GRIN2B):c.5A>C (p.Lys2Thr)	GRIN2B	K2T	Mental retardation, autosomal dominant 6|Epileptic encephalopathy, early infantile, 27	Uncertain significance(Last reviewed: Jul 27, 2020)	criteria provided, single submitter	VCV001051631	12	14019138	12	13866204	1051631	1047825				number of residues with more then 1 mutation	52
NM_000834.5(GRIN2B):c.7C>T (p.Pro3Ser)	GRIN2B	P3S	Mental retardation, autosomal dominant 6	Uncertain significance(Last reviewed: Oct 12, 2018)	criteria provided, single submitter	VCV000930832	12	14019136	12	13866202	930832	919421
NM_000834.4(GRIN2B):c.14C>T (p.Ala5Val)	GRIN2B	A5V	not provided|Mental retardation, autosomal dominant 6|Epileptic encephalopathy, early infantile, 27	Uncertain significance(Last reviewed: Oct 9, 2020)	criteria provided, single submitter	VCV000098443	12	14019129	12	13866195	98443	104336	rs367543147
NM_000834.4(GRIN2B):c.23G>C (p.Cys8Ser)	GRIN2B	C8S	Epileptic encephalopathy, early infantile, 27|Mental retardation, autosomal dominant 6	Uncertain significance(Last reviewed: Sep 5, 2018)	criteria provided, single submitter	VCV000411112	12	14019120	12	13866186	411112	399346	rs1060503160			probability of mutations occuring in the same residue	14.8571
NM_000834.5(GRIN2B):c.28C>A (p.Pro10Thr)	GRIN2B	P10T	not provided	Uncertain significance(Last reviewed: Oct 1, 2018)	criteria provided, single submitter	VCV000806840	12	14019115	12	13866181	806840	796731	rs1164700607
NM_000834.4(GRIN2B):c.36C>A (p.Phe12Leu)	GRIN2B	F12L	not provided	Uncertain significance(Last reviewed: Feb 24, 2017)	criteria provided, single submitter	VCV000423644	12	14019107	12	13866173	423644	408606	rs752668123			Domain	Residus	#mutations
NM_000834.5(GRIN2B):c.38G>T (p.Trp13Leu)	GRIN2B	W13L	Mental retardation, autosomal dominant 6|Epileptic encephalopathy, early infantile, 27	Benign(Last reviewed: Mar 26, 2019)	criteria provided, single submitter	VCV000833797	12	14019105	12	13866171	833797	822068				Signal peptide	1- 26	10
NM_000834.4(GRIN2B):c.43G>A (p.Val15Met)	GRIN2B	V15M	Epileptic encephalopathy	Uncertain significance(Last reviewed: Nov 16, 2016)	criteria provided, single submitter	VCV000375536	12	14019100	12	13866166	375536	362339	rs1057519553			ATD	27-404	61
NM_000834.4(GRIN2B):c.52G>A (p.Val18Ile)	GRIN2B	V18I	Epileptic encephalopathy, early infantile, 27|Mental retardation, autosomal dominant 6|not specified	Conflicting interpretations of pathogenicity(Last reviewed: Jan 14, 2020)	criteria provided, conflicting interpretations	VCV000205705	12	14019091	12	13866157	205705	202681	rs201094029			LBD - S1	405-540	30
NM_000834.4(GRIN2B):c.61G>A (p.Val21Met)	GRIN2B	V21M	not specified|Mental retardation, autosomal dominant 6|Epileptic encephalopathy, early infantile, 27	Conflicting interpretations of pathogenicity(Last reviewed: Dec 31, 2019)	criteria provided, conflicting interpretations	VCV000205706	12	14019082	12	13866148	205706	202680	rs79046967			LBD - S2	662-802	45
NM_000834.4(GRIN2B):c.80G>A (p.Arg27His)	GRIN2B	R27H	History of neurodevelopmental disorder|Epileptic encephalopathy, early infantile, 27|Mental retardation, autosomal dominant 6	Conflicting interpretations of pathogenicity(Last reviewed: Oct 1, 2019)	criteria provided, conflicting interpretations	VCV000588168	12	14019063	12	13866129	588168	579777	rs200727145			Linkers	541-557	5
NM_000834.4(GRIN2B):c.80G>T (p.Arg27Leu)	GRIN2B	R27L	not specified|Mental retardation, autosomal dominant 6|Epileptic encephalopathy, early infantile, 27	Conflicting interpretations of pathogenicity(Last reviewed: Mar 18, 2020)	criteria provided, conflicting interpretations	VCV000391307	12	14019063	12	13866129	391307	372154	rs200727145			Linkers	656-661	2
NM_000834.4(GRIN2B):c.92G>C (p.Ser31Thr)	GRIN2B	S31T	Epileptic encephalopathy, early infantile, 27|Mental retardation, autosomal dominant 6	Benign(Last reviewed: May 29, 2019)	criteria provided, single submitter	VCV000646227	12	14019051	12	13866117	646227	641008	rs746004289			Linkers	803- 817	7
NM_000834.5(GRIN2B):c.94C>T (p.Pro32Ser)	GRIN2B	P32S	Mental retardation, autosomal dominant 6|Epileptic encephalopathy, early infantile, 27	Uncertain significance(Last reviewed: Oct 8, 2020)	criteria provided, single submitter	VCV001062552	12	14019049	12	13866115	1062552	1047824				TMD	558-655	36
NM_000834.4(GRIN2B):c.99dup (p.Ser34fs)	GRIN2B	S34fs	Mental retardation, autosomal dominant 6|not provided|Intellectual disability	Pathogenic/Likely pathogenic(Last reviewed: Sep 10, 2020)	criteria provided, multiple submitters, no conflicts	VCV000430527	12	14019043 - 14019044	12	13866109 - 13866110	430527	421913	rs398122823			TMD	818-838	17
NM_000834.4(GRIN2B):c.125T>C (p.Val42Ala)	GRIN2B	V42A	not provided	Uncertain significance(Last reviewed: Jan 15, 2015)	criteria provided, single submitter	VCV000205727	12	14019018	12	13866084	205727	202679	rs796052580			CTD	839-1438	198
NM_000834.5(GRIN2B):c.136G>A (p.Asp46Asn)	GRIN2B	D46N	Epileptic encephalopathy, early infantile, 27|Mental retardation, autosomal dominant 6	Uncertain significance(Last reviewed: Mar 4, 2020)	criteria provided, single submitter	VCV001026067	12	14019007	12	13866073	1026067	1010297
NM_000834.4(GRIN2B):c.140A>G (p.Glu47Gly)	GRIN2B	E47G	Mental retardation, autosomal dominant 6|Epileptic encephalopathy, early infantile, 27|not provided	Conflicting interpretations of pathogenicity(Last reviewed: Dec 31, 2019)	criteria provided, conflicting interpretations	VCV000205708	12	14019003	12	13866069	205708	202678	rs199526748
NM_000834.5(GRIN2B):c.163G>A (p.Glu55Lys)	GRIN2B	E55K	Seizures	Uncertain significance(Last reviewed: Nov 21, 2019)	no assertion criteria provided	VCV000977405	12	14018980	12	13866046	977405	965530
NM_000834.5(GRIN2B):c.170A>T (p.Asp57Val)	GRIN2B	D57V	Mental retardation, autosomal dominant 6|Epileptic encephalopathy, early infantile, 27|Inborn genetic diseases	Conflicting interpretations of pathogenicity(Last reviewed: Sep 3, 2020)	criteria provided, conflicting interpretations	VCV000856013	12	14018973	12	13866039	856013	839718
NM_000834.4(GRIN2B):c.190G>A (p.Val64Met)	GRIN2B	V64M	not specified|not provided|Mental retardation, autosomal dominant 6|Epileptic encephalopathy, early infantile, 27	Conflicting interpretations of pathogenicity(Last reviewed: Nov 15, 2020)	criteria provided, conflicting interpretations	VCV000205707	12	14018953	12	13866019	205707	202677	rs150070901			Domain		#mutations
NM_000834.5(GRIN2B):c.196C>T (p.Pro66Ser)	GRIN2B	P66S	Epileptic encephalopathy, early infantile, 27|Mental retardation, autosomal dominant 6	Uncertain significance(Last reviewed: Aug 8, 2019)	criteria provided, single submitter	VCV000958187	12	14018947	12	13866013	958187	947923				signal peptide		10
NM_000834.5(GRIN2B):c.232C>A (p.Pro78Thr)	GRIN2B	P78T	Epileptic encephalopathy, early infantile, 27|Mental retardation, autosomal dominant 6	Uncertain significance(Last reviewed: Feb 24, 2020)	criteria provided, single submitter	VCV000947756	12	14018911	12	13865977	947756	926580				ATD		61
NM_000834.4(GRIN2B):c.241A>G (p.Ile81Val)	GRIN2B	I81V	History of neurodevelopmental disorder	Uncertain significance(Last reviewed: Jun 21, 2016)	criteria provided, single submitter	VCV000589850	12	14018902	12	13865968	589850	580052	rs200262227			LBD		75
NM_000834.4(GRIN2B):c.248C>T (p.Thr83Ile)	GRIN2B	T83I	not specified	Uncertain significance(Last reviewed: Jun 1, 2015)	criteria provided, single submitter	VCV000211122	12	14018895	12	13865961	211122	207947	rs797045607			Linkers		14
NM_000834.4(GRIN2B):c.250C>T (p.Arg84Cys)	GRIN2B	R84C	not provided	Likely benign(Last reviewed: Dec 21, 2018)	criteria provided, single submitter	VCV000699210	12	14018893	12	13865959	699210	687948	rs1260965687			TMD		53
NM_000834.4(GRIN2B):c.251G>A (p.Arg84His)	GRIN2B	R84H	not provided	Uncertain significance(Last reviewed: Mar 2, 2016)	criteria provided, single submitter	VCV000234846	12	14018892	12	13865958	234846	231846	rs778695605			CTD		198
NM_000834.5(GRIN2B):c.275G>A (p.Arg92Gln)	GRIN2B	R92Q	Mental retardation, autosomal dominant 6|Epileptic encephalopathy, early infantile, 27	Uncertain significance(Last reviewed: May 21, 2020)	criteria provided, single submitter	VCV000939740	12	14018868	12	13865934	939740	936042				total		411
NM_000834.5(GRIN2B):c.278A>G (p.Lys93Arg)	GRIN2B	K93R	Mental retardation, autosomal dominant 6|Epileptic encephalopathy, early infantile, 27	Benign(Last reviewed: Dec 17, 2019)	criteria provided, single submitter	VCV000833795	12	14018865	12	13865931	833795	822065
NM_000834.5(GRIN2B):c.282C>G (p.Ile94Met)	GRIN2B	I94M	Epileptic encephalopathy, early infantile, 27|Mental retardation, autosomal dominant 6	Uncertain significance(Last reviewed: Apr 17, 2019)	criteria provided, single submitter	VCV000852838	12	14018861	12	13865927	852838	839717
NM_000834.4(GRIN2B):c.325G>T (p.Ala109Ser)	GRIN2B	A109S	Mental retardation, autosomal dominant 6|Epileptic encephalopathy, early infantile, 27|not provided	Conflicting interpretations of pathogenicity(Last reviewed: Apr 3, 2019)	criteria provided, conflicting interpretations	VCV000246440	12	14018818	12	13865884	246440	244814	rs772078838
NM_000834.5(GRIN2B):c.364C>T (p.Pro122Ser)	GRIN2B	P122S	Epileptic encephalopathy, early infantile, 27|Mental retardation, autosomal dominant 6	Likely benign(Last reviewed: Oct 12, 2020)	criteria provided, single submitter	VCV000938350	12	14018779	12	13865845	938350	936041
NM_000834.4(GRIN2B):c.377T>C (p.Ile126Thr)	GRIN2B	I126T	not specified	Uncertain significance(Last reviewed: Sep 17, 2015)	criteria provided, single submitter	VCV000245940	12	14018766	12	13865832	245940	244812	rs879254008
NM_000834.5(GRIN2B):c.396G>A (p.Met132Ile)	GRIN2B	M132I	Inborn genetic diseases	Uncertain significance(Last reviewed: Nov 30, 2017)	criteria provided, single submitter	VCV000985796	12	14018747	12	13865813	985796	973836
NM_000834.5(GRIN2B):c.427T>C (p.Phe143Leu)	GRIN2B	F143L	Epileptic encephalopathy, early infantile, 27|Mental retardation, autosomal dominant 6	Uncertain significance(Last reviewed: Sep 11, 2020)	criteria provided, single submitter	VCV001060621	12	13906834	12	13753900	1060621	1047823
NM_000834.4(GRIN2B):c.448A>G (p.Ile150Val)	GRIN2B	I150V	Mental retardation, autosomal dominant 6	Likely pathogenic(Last reviewed: Apr 4, 2017)	criteria provided, single submitter	VCV000205709	12	13906813	12	13753879	205709	202675
NM_000834.4(GRIN2B):c.466G>A (p.Val156Ile)	GRIN2B	V156I	not provided|GRIN2B-Related Disorder|Mental retardation, autosomal dominant 6|Epileptic encephalopathy, early infantile, 27	Uncertain significance(Last reviewed: Jul 21, 2020)	criteria provided, multiple submitters, no conflicts	VCV000546534	12	13906795	12	13753861	546534	536834	rs1555133189
NM_000834.4(GRIN2B):c.471G>C (p.Met157Ile)	GRIN2B	M157I	not provided	Uncertain significance(Last reviewed: Dec 31, 2015)	criteria provided, single submitter	VCV000234730	12	13906790	12	13753856	234730	231845	rs876661185
NM_000834.4(GRIN2B):c.514G>A (p.Val172Ile)	GRIN2B	V172I	Epileptic encephalopathy, early infantile, 27|Mental retardation, autosomal dominant 6	Likely benign(Last reviewed: Oct 28, 2019)	criteria provided, single submitter	VCV000411111	12	13906747	12	13753813	411111	399345	rs201377003
NM_000834.5(GRIN2B):c.538C>T (p.Gln180Ter)	GRIN2B	Q180*	Mental retardation, autosomal dominant 6	Pathogenic(Last reviewed: Apr 4, 2017)	criteria provided, single submitter	VCV000916594	12	13906723	12	13753789	916594	904940
NM_000834.4(GRIN2B):c.542A>G (p.Asp181Gly)	GRIN2B	D181G	Epileptic encephalopathy, early infantile, 27|Mental retardation, autosomal dominant 6	Uncertain significance(Last reviewed: May 30, 2016)	criteria provided, single submitter	VCV000411113	12	13906719	12	13753785	411113	398876	rs1060503161
NM_000834.5(GRIN2B):c.649C>T (p.Gln217Ter)	GRIN2B	Q217*	Mental retardation, autosomal dominant 6	Pathogenic(Last reviewed: Apr 4, 2017)	criteria provided, single submitter	VCV000916595	12	13906612	12	13753678	916595	904939
NM_000834.4(GRIN2B):c.674G>A (p.Ser225Asn)	GRIN2B	S225N	Epileptic encephalopathy, early infantile, 27|Mental retardation, autosomal dominant 6	Uncertain significance(Last reviewed: Dec 15, 2016)	criteria provided, single submitter	VCV000411107	12	13906587	12	13753653	411107	399032	rs1060503158
NM_000834.4(GRIN2B):c.679A>G (p.Ile227Val)	GRIN2B	I227V	Mental retardation, autosomal dominant 6|Epileptic encephalopathy, early infantile, 27|not provided	Conflicting interpretations of pathogenicity(Last reviewed: Dec 31, 2019)	criteria provided, conflicting interpretations	VCV000429966	12	13906582	12	13753648	429966	421912	rs201672517
NM_000834.4(GRIN2B):c.706G>T (p.Glu236Ter)	GRIN2B	E236*	Complex neurodevelopmental disorder|not provided	Pathogenic(Last reviewed: Apr 16, 2018)	criteria provided, single submitter	VCV000523893	12	13906555	12	13753621	523893	514637	rs1555133077
NM_000834.4(GRIN2B):c.730G>T (p.Ala244Ser)	GRIN2B	A244S	not provided	Uncertain significance(Last reviewed: Jun 22, 2017)	criteria provided, single submitter	VCV000432918	12	13906531	12	13753597	432918	425961	rs1555133062
NM_000834.5(GRIN2B):c.737C>A (p.Ser246Ter)	GRIN2B	S246*	Mental retardation, autosomal dominant 6	Pathogenic(Last reviewed: Apr 4, 2017)	criteria provided, single submitter	VCV000916596	12	13906524	12	13753590	916596	904938
NM_000834.4(GRIN2B):c.801_802CA[1] (p.Thr268fs)	GRIN2B	T268fs	Mental retardation, autosomal dominant 6	Pathogenic(Last reviewed: Apr 4, 2017)	criteria provided, single submitter	VCV000029729	12	13906457 - 13906458	12	13753523 - 13753524	29729	38684	rs1060499526
NM_000834.5(GRIN2B):c.802A>C (p.Thr268Pro)	GRIN2B	T268P	Epileptic encephalopathy, early infantile, 27|Mental retardation, autosomal dominant 6	Uncertain significance(Last reviewed: Oct 9, 2020)	criteria provided, single submitter	VCV001041088	12	13906459	12	13753525	1041088	1030823
NM_000834.4(GRIN2B):c.812C>A (p.Ala271Glu)	GRIN2B	A271E	not specified	Likely benign(Last reviewed: Nov 7, 2013)	criteria provided, single submitter	VCV000205701	12	13906449	12	13753515	205701	202674	rs138098032
NM_000834.4(GRIN2B):c.812C>T (p.Ala271Val)	GRIN2B	A271V	not specified|History of neurodevelopmental disorder|Epileptic encephalopathy, early infantile, 27|Mental retardation, autosomal dominant 6	Likely benign(Last reviewed: Nov 14, 2020)	criteria provided, multiple submitters, no conflicts	VCV000377943	12	13906449	12	13753515	377943	374876	rs138098032
NM_000834.5(GRIN2B):c.823A>G (p.Thr275Ala)	GRIN2B	T275A	Epileptic encephalopathy, early infantile, 27|Mental retardation, autosomal dominant 6	Uncertain significance(Last reviewed: Jan 3, 2020)	criteria provided, single submitter	VCV001010147	12	13906438	12	13753504	1010147	995071
NM_000834.4(GRIN2B):c.838_839del (p.Val280fs)	GRIN2B	V280fs	not provided	Pathogenic(Last reviewed: Jan 26, 2018)	criteria provided, single submitter	VCV000450181	12	13906422 - 13906423	12	13753488 - 13753489	450181	444955	rs1555133006
NM_000834.4(GRIN2B):c.841T>A (p.Ser281Thr)	GRIN2B	S281T	not provided	Uncertain significance(Last reviewed: Apr 13, 2017)	criteria provided, single submitter	VCV000426490	12	13906420	12	13753486	426490	415327	rs1085307651
NM_000834.5(GRIN2B):c.868C>T (p.Pro290Ser)	GRIN2B	P290S	Mental retardation, autosomal dominant 6|Epileptic encephalopathy, early infantile, 27	Benign(Last reviewed: Jan 2, 2020)	criteria provided, single submitter	VCV000849384	12	13906393	12	13753459	849384	839716
NM_000834.5(GRIN2B):c.871G>A (p.Ala291Thr)	GRIN2B	A291T	Mental retardation, autosomal dominant 6|Epileptic encephalopathy, early infantile, 27	Benign(Last reviewed: Sep 17, 2019)	criteria provided, single submitter	VCV000833844	12	13906390	12	13753456	833844	822064
NM_000834.5(GRIN2B):c.895A>G (p.Ile299Val)	GRIN2B	I299V	Epileptic encephalopathy, early infantile, 27|Mental retardation, autosomal dominant 6	Likely pathogenic	no assertion criteria provided	VCV000988725	12	13906366	12	13753432	988725	976661
NM_000834.4(GRIN2B):c.923T>C (p.Leu308Pro)	GRIN2B	L308P	Mental retardation, autosomal dominant 6|Epileptic encephalopathy, early infantile, 27	Uncertain significance(Last reviewed: May 25, 2018)	criteria provided, single submitter	VCV000583000	12	13906338	12	13753404	583000	567941	rs1565524674
NM_000834.4(GRIN2B):c.935G>A (p.Ser312Asn)	GRIN2B	S312N	not provided	Uncertain significance(Last reviewed: Apr 12, 2017)	criteria provided, single submitter	VCV000426563	12	13906326	12	13753392	426563	415326	rs1085307687
NM_000834.5(GRIN2B):c.958A>G (p.Ser320Gly)	GRIN2B	S320G	Epileptic encephalopathy, early infantile, 27|Mental retardation, autosomal dominant 6	Uncertain significance(Last reviewed: Dec 30, 2019)	criteria provided, single submitter	VCV000838589	12	13906303	12	13753369	838589	839715
NM_000834.4(GRIN2B):c.973C>G (p.His325Asp)	GRIN2B	H325D	not provided	Benign(Last reviewed: Mar 2, 2018)	criteria provided, single submitter	VCV000735839	12	13906288	12	13753354	735839	753263	rs773859531
NM_000834.4(GRIN2B):c.992A>G (p.Gln331Arg)	GRIN2B	Q331R	Epileptic encephalopathy, early infantile, 27|Mental retardation, autosomal dominant 6	Benign(Last reviewed: Mar 27, 2019)	criteria provided, single submitter	VCV000665802	12	13906269	12	13753335	665802	641007	rs1555132930
NM_000834.5(GRIN2B):c.996del (p.Asn333fs)	GRIN2B	N333fs	not provided	Pathogenic(Last reviewed: Oct 31, 2017)	criteria provided, single submitter	VCV000988415	12	13906265	12	13753331	988415	976365
NM_000834.5(GRIN2B):c.1016del (p.Leu339fs)	GRIN2B	L339fs	not provided	Likely pathogenic(Last reviewed: Mar 1, 2020)	criteria provided, single submitter	VCV000916406	12	13828788	12	13675854	916406	904564
NM_000834.5(GRIN2B):c.1022A>T (p.Asn341Ile)	GRIN2B	N341I	Intellectual disability	Likely pathogenic(Last reviewed: Sep 10, 2020)	criteria provided, single submitter	VCV000981284	12	13828782	12	13675848	981284	969375
NM_000834.5(GRIN2B):c.1088del (p.Val363fs)	GRIN2B	V363fs	Mental retardation, autosomal dominant 6	Pathogenic(Last reviewed: Apr 4, 2017)	criteria provided, single submitter	VCV000916597	12	13828716	12	13675782	916597	904937
NM_000834.5(GRIN2B):c.1103A>C (p.Asn368Thr)	GRIN2B	N368T	Mental retardation, autosomal dominant 6|Epileptic encephalopathy, early infantile, 27	Benign(Last reviewed: Nov 11, 2019)	criteria provided, single submitter	VCV000833990	12	13828701	12	13675767	833990	822063
NM_000834.5(GRIN2B):c.1119G>A (p.Trp373Ter)	GRIN2B	W373*	Mental retardation, autosomal dominant 6	Pathogenic(Last reviewed: Apr 4, 2017)	criteria provided, single submitter	VCV000916603	12	13828685	12	13675751	916603	904936
NM_000834.4(GRIN2B):c.1147T>G (p.Ser383Ala)	GRIN2B	S383A	Epileptic encephalopathy, early infantile, 27|Mental retardation, autosomal dominant 6	Uncertain significance(Last reviewed: Oct 30, 2018)	criteria provided, single submitter	VCV000665671	12	13769570	12	13616636	665671	641006	rs199671864
NM_000834.4(GRIN2B):c.1147T>A (p.Ser383Thr)	GRIN2B	S383T	Epileptic encephalopathy, early infantile, 27|Mental retardation, autosomal dominant 6|not specified	Conflicting interpretations of pathogenicity(Last reviewed: Dec 31, 2019)	criteria provided, conflicting interpretations	VCV000234314	12	13769570	12	13616636	234314	231844	rs199671864
NM_000834.5(GRIN2B):c.1177C>T (p.Arg393Ter)	GRIN2B	R393*	Complex neurodevelopmental disorder|not provided	Likely pathogenic(Last reviewed: Oct 1, 2020)	criteria provided, single submitter	VCV000984851	12	13769540	12	13616606	984851	972967
NM_000834.4(GRIN2B):c.1238A>G (p.Glu413Gly)	GRIN2B	E413G	Mental retardation, autosomal dominant 6	Pathogenic(Last reviewed: Apr 4, 2017)	criteria provided, single submitter	VCV000143189	12	13769479	12	13616545	143189	152907	rs527236034
NM_000834.5(GRIN2B):c.1240G>A (p.Ala414Thr)	GRIN2B	A414T	Mental retardation, autosomal dominant 6|Epileptic encephalopathy, early infantile, 27	Uncertain significance(Last reviewed: Feb 12, 2020)	criteria provided, single submitter	VCV001006543	12	13769477	12	13616543	1006543	995069
NM_000834.5(GRIN2B):c.1251dup (p.Ile418fs)	GRIN2B	I418fs	Intellectual disability	Pathogenic(Last reviewed: Sep 10, 2020)	criteria provided, single submitter	VCV000981285	12	13769465 - 13769466	12	13616531 - 13616532	981285	969374
NM_000834.4(GRIN2B):c.1280G>T (p.Gly427Val)	GRIN2B	G427V	Epileptic encephalopathy, early infantile, 27|Mental retardation, autosomal dominant 6	Likely pathogenic(Last reviewed: Sep 14, 2018)	criteria provided, single submitter	VCV000663217	12	13769437	12	13616503	663217	641005	rs1591643530
NM_000834.5(GRIN2B):c.1287C>A (p.Cys429Ter)	GRIN2B	C429*	Mental retardation, autosomal dominant 6	Likely pathogenic(Last reviewed: May 6, 2020)	no assertion criteria provided	VCV000993010	12	13769430	12	13616496	993010	980945
NM_000834.4(GRIN2B):c.1306T>C (p.Cys436Arg)	GRIN2B	C436R	Mental retardation, autosomal dominant 6	Conflicting interpretations of pathogenicity(Last reviewed: Sep 1, 2017)	criteria provided, conflicting interpretations	VCV000561022	12	13769411	12	13616477	561022	552160	rs1565478152
NM_000834.4(GRIN2B):c.1316G>A (p.Arg439His)	GRIN2B	R439H	not provided	Uncertain significance(Last reviewed: Jun 1, 2017)	criteria provided, single submitter	VCV000432446	12	13769401	12	13616467	432446	425960	rs752720799
NM_000834.5(GRIN2B):c.1318A>G (p.Ile440Val)	GRIN2B	I440V	Epileptic encephalopathy, early infantile, 27|Mental retardation, autosomal dominant 6	Uncertain significance(Last reviewed: Nov 19, 2019)	criteria provided, single submitter	VCV000848907	12	13769399	12	13616465	848907	839714
NM_000834.4(GRIN2B):c.1345G>T (p.Glu449Ter)	GRIN2B	E449*	Mental retardation, autosomal dominant 6|Epileptic encephalopathy, early infantile, 27	Pathogenic(Last reviewed: Feb 19, 2019)	criteria provided, single submitter	VCV000544230	12	13768582	12	13615648	544230	527240	rs1555112186
NM_000834.5(GRIN2B):c.1368C>A (p.Cys456Ter)	GRIN2B	C456*	not provided	Pathogenic(Last reviewed: Sep 1, 2016)	criteria provided, single submitter	VCV000872101	12	13768559	12	13615625	872101	859955
NM_000834.4(GRIN2B):c.1367G>A (p.Cys456Tyr)	GRIN2B	C456Y	Mental retardation, autosomal dominant 6	Likely pathogenic(Last reviewed: Apr 4, 2017)	criteria provided, single submitter	VCV000039658	12	13768560	12	13615626	39658	48257	rs397514555
NM_000834.4(GRIN2B):c.1372A>T (p.Lys458Ter)	GRIN2B	K458*	not provided	Pathogenic(Last reviewed: Jan 9, 2017)	criteria provided, single submitter	VCV000392200	12	13768555	12	13615621	392200	374871	rs1057524392
NM_000834.5(GRIN2B):c.1382G>T (p.Cys461Phe)	GRIN2B	C461F	Mental retardation, autosomal dominant 6	Likely pathogenic(Last reviewed: Apr 4, 2017)	criteria provided, single submitter	VCV000916598	12	13768545	12	13615611	916598	904935
NM_000834.5(GRIN2B):c.1396A>T (p.Lys466Ter)	GRIN2B	K466*	not provided	Pathogenic(Last reviewed: Jan 1, 2019)	criteria provided, single submitter	VCV000872100	12	13768531	12	13615597	872100	859954
NM_000834.5(GRIN2B):c.1439_1446del (p.Leu480fs)	GRIN2B	L480fs	Mental retardation, autosomal dominant 6|Behavioral abnormality|Self-injurious behavior|Microcephaly|Sleep disturbance|Muscular hypotonia|Intellectual disability	Pathogenic(Last reviewed: Dec 12, 2019)	criteria provided, single submitter	VCV000916029	12	13768481 - 13768488	12	13615547 - 13615554	916029	904254
NM_000834.4(GRIN2B):c.1440_1443dup (p.Thr482fs)	GRIN2B	T482fs	not provided	Pathogenic(Last reviewed: Apr 20, 2017)	criteria provided, single submitter	VCV000429224	12	13768483 - 13768484	12	13615549 - 13615550	429224	421911	rs1131691268
NM_000834.4(GRIN2B):c.1458T>A (p.His486Gln)	GRIN2B	H486Q	Mental retardation, autosomal dominant 6	Likely pathogenic(Last reviewed: May 28, 2019)	criteria provided, single submitter	VCV000802825	12	13768469	12	13615535	802825	791219	rs763436882
NM_000834.5(GRIN2B):c.1478C>A (p.Thr493Asn)	GRIN2B	T493N	Epileptic encephalopathy, early infantile, 27|Mental retardation, autosomal dominant 6	Uncertain significance(Last reviewed: Sep 24, 2020)	criteria provided, single submitter	VCV001059947	12	13768449	12	13615515	1059947	1047822
NM_000834.5(GRIN2B):c.1496G>A (p.Gly499Glu)	GRIN2B	G499E	Complex neurodevelopmental disorder	Likely pathogenic(Last reviewed: Feb 8, 2019)	no assertion criteria provided	VCV000984806	12	13768431	12	13615497	984806	972966
NM_000834.5(GRIN2B):c.1495G>A (p.Gly499Arg)	GRIN2B	G499R	not provided|Mental retardation, autosomal dominant 6	Likely pathogenic(Last reviewed: Apr 15, 2019)	criteria provided, multiple submitters, no conflicts	VCV000916069	12	13768432	12	13615498	916069	904304
NM_000834.5(GRIN2B):c.1525G>A (p.Ala509Thr)	GRIN2B	A509T	Mental retardation, autosomal dominant 6|Epileptic encephalopathy, early infantile, 27	Uncertain significance(Last reviewed: Mar 14, 2019)	criteria provided, single submitter	VCV000835834	12	13768177	12	13615243	835834	839713
NM_000834.5(GRIN2B):c.1540A>G (p.Thr514Ala)	GRIN2B	T514A	Mental retardation, autosomal dominant 6	Likely pathogenic(Last reviewed: Apr 4, 2017)	criteria provided, single submitter	VCV000916599	12	13768162	12	13615228	916599	904934
NM_000834.4(GRIN2B):c.1547A>G (p.Asn516Ser)	GRIN2B	N516S	Epileptic encephalopathy, early infantile, 27|Mental retardation, autosomal dominant 6|Complex neurodevelopmental disorder|Mental retardation, autosomal dominant 6|not provided	Conflicting interpretations of pathogenicity(Last reviewed: Dec 13, 2017)	criteria provided, conflicting interpretations	VCV000279975	12	13768155	12	13615221	279975	264589	rs886041295
NM_000834.4(GRIN2B):c.1555C>T (p.Arg519Ter)	GRIN2B	R519*	Complex neurodevelopmental disorder|not provided|Mental retardation, autosomal dominant 6|Intellectual disability	Pathogenic(Last reviewed: Sep 10, 2020)	criteria provided, multiple submitters, no conflicts	VCV000391757	12	13768147	12	13615213	391757	372867	rs774592932
NM_000834.5(GRIN2B):c.1555C>G (p.Arg519Gly)	GRIN2B	R519G	Complex neurodevelopmental disorder	Likely pathogenic(Last reviewed: Sep 5, 2018)	no assertion criteria provided	VCV000984849	12	13768147	12	13615213	984849	972965
NM_000834.5(GRIN2B):c.1556G>A (p.Arg519Gln)	GRIN2B	R519Q	Mental retardation, autosomal dominant 6|Epileptic encephalopathy, early infantile, 27|Intellectual disability	Likely pathogenic(Last reviewed: Sep 10, 2020)	criteria provided, single submitter	VCV000981287	12	13768146	12	13615212	981287	969373
NM_000834.5(GRIN2B):c.1573T>G (p.Phe525Val)	GRIN2B	F525V	Mental retardation, autosomal dominant 6	Likely pathogenic(Last reviewed: Apr 4, 2017)	criteria provided, single submitter	VCV000916600	12	13768129	12	13615195	916600	904933
NM_000834.5(GRIN2B):c.1576T>C	GRIN2B	S526P	Complex neurodevelopmental disorder|not provided	Pathogenic(Last reviewed: May 12, 2017)	criteria provided, single submitter	VCV000429969	12	13768126	12	13615192	429969	421910	rs1131691702
NM_000834.4(GRIN2B):c.1598G>A (p.Gly533Asp)	GRIN2B	G533D	Epileptic encephalopathy, early infantile, 27	Likely pathogenic(Last reviewed: Sep 22, 2014)	criteria provided, single submitter	VCV000397525	12	13768104	12	13615170	397525	384421	rs1060499659
NM_000834.4(GRIN2B):c.1619G>A (p.Arg540His)	GRIN2B	R540H	Mental retardation, autosomal dominant 6|Intellectual disability	Likely pathogenic(Last reviewed: Sep 10, 2020)	criteria provided, multiple submitters, no conflicts	VCV000162087	12	13768083	12	13615149	162087	171803	rs672601378
NM_000834.5(GRIN2B):c.1623C>G (p.Ser541Arg)	GRIN2B	S541R	Mental retardation, autosomal dominant 6	Pathogenic(Last reviewed: Apr 4, 2017)	criteria provided, single submitter	VCV000916601	12	13768079	12	13615145	916601	904932
NM_000834.5(GRIN2B):c.1627G>C (p.Gly543Arg)	GRIN2B	G543R	Complex neurodevelopmental disorder	Likely pathogenic(Last reviewed: Sep 15, 2016)	no assertion criteria provided	VCV000984886	12	13768075	12	13615141	984886	972964
NM_000834.4(GRIN2B):c.1649T>C (p.Phe550Ser)	GRIN2B	F550S	Inborn genetic diseases	Likely pathogenic(Last reviewed: Nov 16, 2017)	criteria provided, single submitter	VCV000522093	12	13768053	12	13615119	522093	511982	rs1555112021
NM_000834.4(GRIN2B):c.1658C>T (p.Pro553Leu)	GRIN2B	P553L	Mental retardation, autosomal dominant 6	Likely pathogenic(Last reviewed: Apr 4, 2017)	criteria provided, single submitter	VCV000039661	12	13764781	12	13611847	39661	48260	rs397514556
NM_000834.5(GRIN2B):c.1664G>T (p.Ser555Ile)	GRIN2B	S555I	Complex neurodevelopmental disorder|Mental retardation, autosomal dominant 6	Likely pathogenic(Last reviewed: Apr 4, 2017)	criteria provided, single submitter	VCV000916602	12	13764775	12	13611841	916602	904931
NM_000834.4(GRIN2B):c.1672G>A (p.Val558Ile)	GRIN2B	V558I	not specified|Complex neurodevelopmental disorder|Mental retardation, autosomal dominant 6|intellectual deficiency	Conflicting interpretations of pathogenicity(Last reviewed: May 28, 2019)	criteria provided, conflicting interpretations	VCV000374243	12	13764767	12	13611833	374243	361141	rs1057519004
NM_000834.4(GRIN2B):c.1677G>A (p.Trp559Ter)	GRIN2B	W559*	Mental retardation, autosomal dominant 6|not provided	Pathogenic(Last reviewed: Apr 23, 2018)	criteria provided, multiple submitters, no conflicts	VCV000039660	12	13764762	12	13611828	39660	48259	rs398122825
NM_000834.5(GRIN2B):c.1675T>A (p.Trp559Arg)	GRIN2B	W559R	Complex neurodevelopmental disorder	Uncertain significance(Last reviewed: Dec 4, 2018)	no assertion criteria provided	VCV000984850	12	13764764	12	13611830	984850	972963
NM_000834.5(GRIN2B):c.1675T>C (p.Trp559Arg)	GRIN2B	W559R	Mental retardation, autosomal dominant 6|Mental retardation, autosomal dominant 6|Epileptic encephalopathy, early infantile, 27	Likely pathogenic(Last reviewed: Jul 9, 2019)	criteria provided, multiple submitters, no conflicts	VCV000928560	12	13764764	12	13611830	928560	917108
NM_000834.5(GRIN2B):c.1685T>C (p.Met562Thr)	GRIN2B	M562T	Mental retardation, autosomal dominant 6	Uncertain significance(Last reviewed: Nov 29, 2017)	criteria provided, single submitter	VCV000976412	12	13764754	12	13611820	976412	964381
NM_000834.4(GRIN2B):c.1705G>A (p.Val569Ile)	GRIN2B	V569I	Epileptic encephalopathy, early infantile, 27|Mental retardation, autosomal dominant 6	Uncertain significance(Last reviewed: Feb 16, 2018)	criteria provided, single submitter	VCV000567253	12	13764734	12	13611800	567253	571731	rs1293991066
NM_000834.4(GRIN2B):c.1745C>G (p.Pro582Arg)	GRIN2B	P582R	not provided	Uncertain significance(Last reviewed: Jan 9, 2015)	criteria provided, single submitter	VCV000205728	12	13764694	12	13611760	205728	202673	rs796052581
NM_000834.5(GRIN2B):c.1756A>C (p.Asn586His)	GRIN2B	N586H	Epileptic encephalopathy, early infantile, 27|Mental retardation, autosomal dominant 6	Uncertain significance(Last reviewed: Jan 5, 2020)	criteria provided, single submitter	VCV000999589	12	13764683	12	13611749	999589	995068
NM_000834.4(GRIN2B):c.1768G>A (p.Ala590Thr)	GRIN2B	A590T	not specified|not provided|Mental retardation, autosomal dominant 6|Epileptic encephalopathy, early infantile, 27	Conflicting interpretations of pathogenicity(Last reviewed: Sep 17, 2020)	criteria provided, conflicting interpretations	VCV000205729	12	13764671	12	13611737	205729	202672	rs145021339
NM_000834.5(GRIN2B):c.1783C>A (p.Pro595Thr)	GRIN2B	P595T	Mental retardation, autosomal dominant 6	Uncertain significance(Last reviewed: Nov 5, 2020)	criteria provided, single submitter	VCV001028883	12	13761764	12	13608830	1028883	1017589
NM_000834.5(GRIN2B):c.1807G>C (p.Gly603Arg)	GRIN2B	G603R	not provided	Uncertain significance(Last reviewed: Sep 1, 2016)	criteria provided, single submitter	VCV000806838	12	13761740	12	13608806	806838	796729	rs1156304737
NM_000834.4(GRIN2B):c.1821G>A (p.Trp607Ter)	GRIN2B	W607*	Epileptic encephalopathy, early infantile, 27|Mental retardation, autosomal dominant 6	Pathogenic(Last reviewed: May 11, 2020)	criteria provided, single submitter	VCV000574682	12	13761726	12	13608792	574682	571720	rs1057518700
NM_000834.5(GRIN2B):c.1821G>T (p.Trp607Cys)	GRIN2B	W607C	Mental retardation, autosomal dominant 6	Likely pathogenic(Last reviewed: Apr 4, 2017)	criteria provided, single submitter	VCV000916606	12	13761726	12	13608792	916606	904930
NM_000834.4(GRIN2B):c.1821G>C (p.Trp607Cys)	GRIN2B	W607C	Mental retardation, autosomal dominant 6	Likely pathogenic(Last reviewed: Mar 13, 2015)	no assertion criteria provided	VCV000374327	12	13761726	12	13608792	374327	361203	rs1057518700
NM_000834.5(GRIN2B):c.1820G>C (p.Trp607Ser)	GRIN2B	W607S	Epileptic encephalopathy, early infantile, 27	Uncertain significance(Last reviewed: Feb 5, 2020)	no assertion criteria provided	VCV000828156	12	13761727	12	13608793	828156	816474	rs1591638805
NM_000834.4(GRIN2B):c.1823T>A (p.Leu608Ter)	GRIN2B	L608*	Complex neurodevelopmental disorder|not provided	Pathogenic(Last reviewed: Jan 22, 2016)	criteria provided, single submitter	VCV000285854	12	13761724	12	13608790	285854	270091	rs886043237
NM_000834.4(GRIN2B):c.1832G>T (p.Gly611Val)	GRIN2B	G611V	Complex neurodevelopmental disorder|Mental retardation, autosomal dominant 6	Likely pathogenic(Last reviewed: Apr 4, 2017)	criteria provided, single submitter	VCV000205730	12	13761715	12	13608781	205730	202670
NM_000834.4(GRIN2B):c.1844A>T (p.Asn615Ile)	GRIN2B	N615I	Epileptic encephalopathy, early infantile, 27|Mental retardation, autosomal dominant 6	Likely pathogenic(Last reviewed: Apr 4, 2017)	criteria provided, single submitter	VCV000162086	12	13761703	12	13608769	162086	171802	rs672601377
NM_000834.5(GRIN2B):c.1845C>G (p.Asn615Lys)	GRIN2B	N615K	Mental retardation, autosomal dominant 6	Likely pathogenic(Last reviewed: Apr 4, 2017)	criteria provided, single submitter	VCV000916607	12	13761702	12	13608768	916607	904929
NM_000834.5(GRIN2B):c.1848C>G (p.Asn616Lys)	GRIN2B	N616K	Mental retardation, autosomal dominant 6	Likely pathogenic(Last reviewed: Apr 4, 2017)	criteria provided, single submitter	VCV000916608	12	13761699	12	13608765	916608	904928
NM_000834.5(GRIN2B):c.1847A>G (p.Asn616Ser)	GRIN2B	N616S	Mental retardation, autosomal dominant 6|Epileptic encephalopathy, early infantile, 27	Likely pathogenic(Last reviewed: Mar 5, 2020)	criteria provided, single submitter	VCV000843669	12	13761700	12	13608766	843669	839711
NM_000834.4(GRIN2B):c.1853T>G (p.Val618Gly)	GRIN2B	V618G	Epileptic encephalopathy, early infantile, 27|Mental retardation, autosomal dominant 6	Likely pathogenic(Last reviewed: Apr 4, 2017)	criteria provided, single submitter	VCV000162085	12	13761694	12	13608760	162085	171801	rs672601376
NM_000834.4(GRIN2B):c.1858G>A (p.Val620Met)	GRIN2B	V620M	Complex neurodevelopmental disorder|Epileptic encephalopathy, early infantile, 27|Mental retardation, autosomal dominant 6|not provided|Mental retardation, autosomal dominant 6	Likely pathogenic(Last reviewed: Jun 7, 2017)	criteria provided, multiple submitters, no conflicts	VCV000205710	12	13761689	12	13608755	205710	202669	rs796052571
NM_000834.5(GRIN2B):c.1883C>G (p.Ser628Cys)	GRIN2B	S628C	Mental retardation, autosomal dominant 6	Likely pathogenic(Last reviewed: Apr 4, 2017)	criteria provided, single submitter	VCV000916609	12	13761664	12	13608730	916609	904927
NM_000834.5(GRIN2B):c.1883C>T (p.Ser628Phe)	GRIN2B	S628F	Mental retardation, autosomal dominant 6	Likely pathogenic(Last reviewed: Apr 4, 2017)	criteria provided, single submitter	VCV000916610	12	13761664	12	13608730	916610	904926
NM_000834.5(GRIN2B):c.1906G>C (p.Ala636Pro)	GRIN2B	A636P	Mental retardation, autosomal dominant 6	Likely pathogenic(Last reviewed: Apr 4, 2017)	criteria provided, single submitter	VCV000916611	12	13761641	12	13608707	916611	904925
NM_000834.4(GRIN2B):c.1907C>T (p.Ala636Val)	GRIN2B	A636V	Mental retardation, autosomal dominant 6	Likely pathogenic(Last reviewed: Apr 4, 2017)	criteria provided, single submitter	VCV000205731	12	13761640	12	13608706	205731	202668
NM_000834.4(GRIN2B):c.1916C>T (p.Ala639Val)	GRIN2B	A639V	Mental retardation, autosomal dominant 6|Inborn genetic diseases	Pathogenic/Likely pathogenic(Last reviewed: Apr 4, 2017)	criteria provided, multiple submitters, no conflicts	VCV000208749	12	13761631	12	13608697	208749	205274	rs797044930
NM_000834.5(GRIN2B):c.1922T>C (p.Ile641Thr)	GRIN2B	I641T	Inborn genetic diseases	Uncertain significance(Last reviewed: Oct 16, 2018)	criteria provided, single submitter	VCV000985189	12	13761625	12	13608691	985189	973835
NM_000834.5(GRIN2B):c.1937A>G	GRIN2B	Y646C	Complex neurodevelopmental disorder|Epileptic encephalopathy, early infantile, 27	Uncertain significance(Last reviewed: Sep 1, 2017)	criteria provided, single submitter	VCV000561025	12	13761610	12	13608676	561025	552158	rs1565474582
NM_000834.4(GRIN2B):c.1946A>G (p.Asn649Ser)	GRIN2B	N649S	not specified	Uncertain significance(Last reviewed: Jan 11, 2016)	criteria provided, single submitter	VCV000435389	12	13761601	12	13608667	435389	429411	rs879253945
NM_000834.4(GRIN2B):c.1946A>C (p.Asn649Thr)	GRIN2B	N649T	not specified	Uncertain significance(Last reviewed: Jun 1, 2015)	criteria provided, single submitter	VCV000245786	12	13761601	12	13608667	245786	244802	rs879253945
NM_000834.4(GRIN2B):c.1955C>G (p.Ala652Gly)	GRIN2B	A652G	not provided	Likely pathogenic(Last reviewed: Dec 21, 2016)	criteria provided, single submitter	VCV000245714	12	13761592	12	13608658	245714	244801	rs879253912
NM_000834.4(GRIN2B):c.1954G>C (p.Ala652Pro)	GRIN2B	A652P	not provided	Pathogenic(Last reviewed: Oct 18, 2017)	criteria provided, single submitter	VCV000452873	12	13761593	12	13608659	452873	444952	rs1555110812
NM_000834.5(GRIN2B):c.1961T>G (p.Met654Arg)	GRIN2B	M654R	Intellectual disability	Likely pathogenic(Last reviewed: Sep 10, 2020)	criteria provided, single submitter	VCV000981286	12	13761586	12	13608652	981286	969372
NM_000834.5(GRIN2B):c.1963A>T (p.Ile655Phe)	GRIN2B	I655F	Mental retardation, autosomal dominant 6	Likely pathogenic(Last reviewed: Apr 4, 2017)	criteria provided, single submitter	VCV000916612	12	13761584	12	13608650	916612	904924
NM_000834.4(GRIN2B):c.1966C>T (p.Gln656Ter)	GRIN2B	Q656*	Epileptic encephalopathy, early infantile, 27|Mental retardation, autosomal dominant 6	Pathogenic(Last reviewed: Apr 4, 2017)	criteria provided, multiple submitters, no conflicts	VCV000431127	12	13761581	12	13608647	431127	424660	rs1135401799
NM_000834.4(GRIN2B):c.1970A>G (p.Glu657Gly)	GRIN2B	E657G	Mental retardation, autosomal dominant 6|not provided	Likely pathogenic(Last reviewed: Apr 4, 2017)	criteria provided, multiple submitters, no conflicts	VCV000234479	12	13761577	12	13608643	234479	231842	rs876661041
NM_000834.5(GRIN2B):c.1985A>C (p.Gln662Pro)	GRIN2B	Q662P	Mental retardation, autosomal dominant 6	Likely pathogenic(Last reviewed: Apr 4, 2017)	criteria provided, single submitter	VCV000916613	12	13761562	12	13608628	916613	904923
NM_000834.4(GRIN2B):c.2002G>A (p.Asp668Asn)	GRIN2B	D668N	Motor delay|Long fingers|Joint hypermobility|Delayed speech and language development|Astigmatism|Epileptic encephalopathy, early infantile, 27|Mental retardation, autosomal dominant 6|Epileptic encephalopathy, early infantile, 27	Conflicting interpretations of pathogenicity(Last reviewed: Feb 23, 2018)	criteria provided, conflicting interpretations	VCV000373930	12	13761545	12	13608611	373930	360939	rs876661151
NM_000834.4(GRIN2B):c.2002G>T (p.Asp668Tyr)	GRIN2B	D668Y	Mental retardation, autosomal dominant 6|not provided	Likely pathogenic(Last reviewed: Apr 4, 2017)	criteria provided, multiple submitters, no conflicts	VCV000234668	12	13761545	12	13608611	234668	231841	rs876661151
NM_000834.4(GRIN2B):c.2026G>A (p.Asp676Asn)	GRIN2B	D676N	not provided	Likely pathogenic(Last reviewed: Jan 9, 2018)	criteria provided, single submitter	VCV000633503	12	13724883	12	13571949	633503	621971	rs1565457924
NM_000834.5(GRIN2B):c.2033C>T (p.Ser678Leu)	GRIN2B	S678L	Mental retardation, autosomal dominant 6|Epileptic encephalopathy, early infantile, 27	Uncertain significance(Last reviewed: Feb 18, 2020)	criteria provided, single submitter	VCV001041567	12	13724876	12	13571942	1041567	1030822
NM_000834.4(GRIN2B):c.2039del (p.Pro680fs)	GRIN2B	P680fs	not provided	Pathogenic(Last reviewed: Oct 12, 2017)	criteria provided, single submitter	VCV000452935	12	13724870	12	13571936	452935	444951	rs1555103995
NM_000834.4(GRIN2B):c.2044C>T (p.Arg682Cys)	GRIN2B	R682C	Mental retardation, autosomal dominant 6|Intellectual disability	Pathogenic/Likely pathogenic(Last reviewed: Sep 10, 2020)	criteria provided, multiple submitters, no conflicts	VCV000029730	12	13724865	12	13571931	29730	38685	rs387906636
NM_000834.4(GRIN2B):c.2045G>A (p.Arg682His)	GRIN2B	R682H	Mental retardation, autosomal dominant 6	Likely pathogenic(Last reviewed: Nov 10, 2016)	criteria provided, single submitter	VCV000268209	12	13724864	12	13571930	268209	263825	rs886041095
NM_000834.4(GRIN2B):c.2053A>C (p.Thr685Pro)	GRIN2B	T685P	Epileptic encephalopathy, early infantile, 27|Mental retardation, autosomal dominant 6|Epileptic encephalopathy, early infantile, 27	Conflicting interpretations of pathogenicity(Last reviewed: Feb 18, 2019)	criteria provided, conflicting interpretations	VCV000224086	12	13724856	12	13571922	224086	225816	rs869312669
NM_000834.4(GRIN2B):c.2060C>T (p.Pro687Leu)	GRIN2B	P687L	Complex neurodevelopmental disorder|Mental retardation, autosomal dominant 6	Likely pathogenic(Last reviewed: Apr 4, 2017)	criteria provided, single submitter	VCV000205711	12	13724849	12	13571915	205711	202667
NM_000834.5(GRIN2B):c.2060C>G (p.Pro687Arg)	GRIN2B	P687R	Mental retardation, autosomal dominant 6	Likely pathogenic(Last reviewed: Apr 4, 2017)	criteria provided, single submitter	VCV000916585	12	13724849	12	13571915	916585	904922
NM_000834.4(GRIN2B):c.2064C>A (p.Asn688Lys)	GRIN2B	N688K	Epileptic encephalopathy, early infantile, 27|Mental retardation, autosomal dominant 6	Uncertain significance(Last reviewed: Nov 20, 2018)	criteria provided, single submitter	VCV000643873	12	13724845	12	13571911	643873	641003	rs748606750
NM_000834.4(GRIN2B):c.2065G>A (p.Gly689Ser)	GRIN2B	G689S	Complex neurodevelopmental disorder|Epileptic encephalopathy, early infantile, 27|not provided|Mental retardation, autosomal dominant 6	Pathogenic/Likely pathogenic(Last reviewed: Sep 1, 2019)	criteria provided, multiple submitters, no conflicts	VCV000224818	12	13724844	12	13571910	224818	226651
NM_000834.4(GRIN2B):c.2071A>G (p.Thr691Ala)	GRIN2B	T691A	Mental retardation, autosomal dominant 6	Uncertain significance(Last reviewed: Sep 1, 2017)	criteria provided, single submitter	VCV000561023	12	13724838	12	13571904	561023	552157	rs1565457892
NM_000834.5(GRIN2B):c.2079A>T (p.Arg693Ser)	GRIN2B	R693S	Mental retardation, autosomal dominant 6	Likely pathogenic(Last reviewed: Apr 4, 2017)	criteria provided, single submitter	VCV000916586	12	13724830	12	13571896	916586	904921
NM_000834.4(GRIN2B):c.2078G>C (p.Arg693Thr)	GRIN2B	R693T	Mental retardation, autosomal dominant 6|Epileptic encephalopathy, early infantile, 27	Uncertain significance(Last reviewed: Jan 2, 2018)	criteria provided, single submitter	VCV000582523	12	13724831	12	13571897	582523	566746	rs1565457884
NM_000834.4(GRIN2B):c.2081A>G (p.Asn694Ser)	GRIN2B	N694S	Complex neurodevelopmental disorder|Mental retardation, autosomal dominant 6	Likely pathogenic(Last reviewed: May 28, 2019)	criteria provided, single submitter	VCV000802823	12	13724828	12	13571894	802823	791217	rs1591612317
NM_000834.4(GRIN2B):c.2084T>G (p.Ile695Ser)	GRIN2B	I695S	not provided	Likely pathogenic(Last reviewed: Jun 9, 2016)	criteria provided, single submitter	VCV000432191	12	13724825	12	13571891	432191	425959	rs876661219
NM_000834.4(GRIN2B):c.2084T>C (p.Ile695Thr)	GRIN2B	I695T	not provided|Mental retardation, autosomal dominant 6|intellectual deficiency|Ataxia	Pathogenic/Likely pathogenic(Last reviewed: Jun 29, 2018)	criteria provided, multiple submitters, no conflicts	VCV000234790	12	13724825	12	13571891	234790	231839	rs876661219
NM_000834.5(GRIN2B):c.2087G>A	GRIN2B	R696H	Complex neurodevelopmental disorder|Inborn genetic diseases|Epileptic encephalopathy, early infantile, 27|Mental retardation, autosomal dominant 6|not provided|Mental retardation, autosomal dominant 6|Intellectual disability	Conflicting interpretations of pathogenicity(Last reviewed: Sep 10, 2020)	criteria provided, conflicting interpretations	VCV000489393	12	13724822	12	13571888	489393	482276	rs1555103971
NM_000834.4(GRIN2B):c.2099C>G (p.Ala700Gly)	GRIN2B	A700G	Epileptic encephalopathy, early infantile, 27|Mental retardation, autosomal dominant 6	Uncertain significance(Last reviewed: Aug 6, 2018)	criteria provided, single submitter	VCV000568730	12	13724810	12	13571876	568730	566744	rs1191539298
NM_000834.5(GRIN2B):c.2099C>T (p.Ala700Val)	GRIN2B	A700V	Mental retardation, autosomal dominant 6|Epileptic encephalopathy, early infantile, 27	Uncertain significance(Last reviewed: May 13, 2020)	criteria provided, single submitter	VCV001062366	12	13724810	12	13571876	1062366	1047821
NM_000834.4(GRIN2B):c.2116A>G (p.Met706Val)	GRIN2B	M706V	Ataxia|intellectual deficiency|Epilepsy|Mental retardation, autosomal dominant 6|Mental retardation, autosomal dominant 6|Epileptic encephalopathy, early infantile, 27	Likely pathogenic(Last reviewed: Apr 1, 2020)	criteria provided, multiple submitters, no conflicts	VCV000374226	12	13724793	12	13571859	374226	361140	rs1057518988
NM_000834.4(GRIN2B):c.2125T>G (p.Phe709Val)	GRIN2B	F709V	Mental retardation, autosomal dominant 6|Epileptic encephalopathy, early infantile, 27	Uncertain significance(Last reviewed: Oct 3, 2018)	criteria provided, single submitter	VCV000657233	12	13724784	12	13571850	657233	641002	rs1591612279
NM_000834.5(GRIN2B):c.2131C>T (p.Gln711Ter)	GRIN2B	Q711*	Mental retardation, autosomal dominant 6	Pathogenic(Last reviewed: Apr 4, 2017)	criteria provided, single submitter	VCV000916604	12	13724778	12	13571844	916604	904920
NM_000834.4(GRIN2B):c.2177T>C (p.Leu726Pro)	GRIN2B	L726P	Epileptic encephalopathy, early infantile, 27|Mental retardation, autosomal dominant 6	Uncertain significance(Last reviewed: Nov 26, 2018)	criteria provided, single submitter	VCV000640579	12	13722946	12	13570012	640579	641001	rs1591611012
NM_000834.5(GRIN2B):c.2189T>C (p.Ile730Thr)	GRIN2B	I730T	not provided	Likely pathogenic(Last reviewed: Sep 18, 2017)	criteria provided, single submitter	VCV000988380	12	13722934	12	13570000	988380	976364
NM_000834.5(GRIN2B):c.2192A>T (p.Tyr731Phe)	GRIN2B	Y731F	not provided	Uncertain significance(Last reviewed: Jul 1, 2020)	criteria provided, single submitter	VCV001013007	12	13722931	12	13569997	1013007	1000779
NM_000834.4(GRIN2B):c.2196T>G (p.Asp732Glu)	GRIN2B	D732E	Mental retardation, autosomal dominant 6	Likely pathogenic(Last reviewed: May 28, 2019)	criteria provided, single submitter	VCV000802822	12	13722927	12	13569993	802822	791216	rs1591611001
NM_000834.4(GRIN2B):c.2200G>A (p.Ala734Thr)	GRIN2B	A734T	not provided	Uncertain significance(Last reviewed: Aug 22, 2016)	criteria provided, single submitter	VCV000290852	12	13722923	12	13569989	290852	275089	rs886044569
NM_000834.4(GRIN2B):c.2201C>T (p.Ala734Val)	GRIN2B	A734V	Mental retardation, autosomal dominant 6|not provided	Likely pathogenic(Last reviewed: Apr 4, 2017)	criteria provided, multiple submitters, no conflicts	VCV000234527	12	13722922	12	13569988	234527	231840	rs876661064
NM_000834.4(GRIN2B):c.2216T>G (p.Met739Arg)	GRIN2B	M739R	Scoliosis|Microcephaly|Behavioral abnormality|Absent speech|Intrauterine growth retardation|Seizures|Craniosynostosis syndrome|Self-injurious behavior|Abnormal facial shape|Intellectual disability, severe|Difficulty walking	Likely pathogenic(Last reviewed: Jan 1, 2017)	criteria provided, single submitter	VCV000523381	12	13722907	12	13569973	523381	514018	rs1555103652
NM_000834.4(GRIN2B):c.2225G>T (p.Arg742Ile)	GRIN2B	R742I	Behavioral abnormality|Autistic behavior|Seizures|Intellectual disability	Likely pathogenic(Last reviewed: Jan 1, 2017)	criteria provided, single submitter	VCV000523382	12	13722898	12	13569964	523382	514017	rs1555103646
NM_000834.5(GRIN2B):c.2236T>A (p.Cys746Ser)	GRIN2B	C746S	Global developmental delay	Likely pathogenic(Last reviewed: Nov 1, 2019)	no assertion criteria provided	VCV000977621	12	13722887	12	13569953	977621	965761
NM_000834.5(GRIN2B):c.2237G>A (p.Cys746Tyr)	GRIN2B	C746Y	Complex neurodevelopmental disorder	Likely pathogenic(Last reviewed: Mar 11, 2019)	no assertion criteria provided	VCV000984852	12	13722886	12	13569952	984852	972962
NM_000834.4(GRIN2B):c.2251A>C (p.Ile751Leu)	GRIN2B	I751L	not provided	Likely pathogenic(Last reviewed: Feb 1, 2017)	criteria provided, single submitter	VCV000245954	12	13722872	12	13569938	245954	244796	rs879254013
NM_000834.4(GRIN2B):c.2252T>C (p.Ile751Thr)	GRIN2B	I751T	Mental retardation, autosomal dominant 6|Intellectual disability|Complex neurodevelopmental disorder|not provided	Pathogenic/Likely pathogenic(Last reviewed: Sep 10, 2020)	criteria provided, multiple submitters, no conflicts	VCV000234500	12	13722871	12	13569937	234500	231838	rs876661055
NM_000834.4(GRIN2B):c.2260G>A (p.Gly754Arg)	GRIN2B	G754R	not provided	Uncertain significance(Last reviewed: Jun 1, 2017)	criteria provided, single submitter	VCV000444285	12	13722863	12	13569929	444285	437925	rs1555103635
NM_000834.5(GRIN2B):c.2320C>T (p.Arg774Cys)	GRIN2B	R774C	Epileptic encephalopathy, early infantile, 27|Mental retardation, autosomal dominant 6	Uncertain significance(Last reviewed: Feb 17, 2020)	criteria provided, single submitter	VCV001052025	12	13722803	12	13569869	1052025	1047819
NM_000834.5(GRIN2B):c.2325G>C (p.Gln775His)	GRIN2B	Q775H	Mental retardation, autosomal dominant 6|Epileptic encephalopathy, early infantile, 27	Benign(Last reviewed: Apr 25, 2019)	criteria provided, single submitter	VCV000833704	12	13722798	12	13569864	833704	822062
NM_000834.5(GRIN2B):c.2341C>A (p.Leu781Met)	GRIN2B	L781M	not specified	Uncertain significance(Last reviewed: Mar 24, 2021)	criteria provided, single submitter	VCV001050841	12	13722782	12	13569848	1050841	1038945
NM_000834.4(GRIN2B):c.2341C>G (p.Leu781Val)	GRIN2B	L781V	Complex neurodevelopmental disorder|not provided	Likely pathogenic(Last reviewed: Mar 6, 2017)	criteria provided, single submitter	VCV000424022	12	13722782	12	13569848	424022	408605	rs1064796752
NM_000834.5(GRIN2B):c.2392A>C (p.Thr798Pro)	GRIN2B	T798P	Epileptic encephalopathy, early infantile, 27	Pathogenic	criteria provided, single submitter	VCV000917869	12	13720165	12	13567231	917869	906189
NM_000834.5(GRIN2B):c.2393C>G (p.Thr798Ser)	GRIN2B	T798S	Mental retardation, autosomal dominant 6|Epileptic encephalopathy, early infantile, 27	Likely benign(Last reviewed: Jun 28, 2019)	criteria provided, single submitter	VCV000833621	12	13720164	12	13567230	833621	822061
NM_000834.4(GRIN2B):c.2395G>A (p.Gly799Ser)	GRIN2B	G799S	Intellectual disability|Developmental delay	Likely pathogenic(Last reviewed: May 16, 2016)	no assertion criteria provided	VCV000373959	12	13720162	12	13567228	373959	360938	rs1057518800
NM_000834.5(GRIN2B):c.2419G>A (p.Glu807Lys)	GRIN2B	E807K	Mental retardation, autosomal dominant 6	Likely pathogenic(Last reviewed: Apr 4, 2017)	criteria provided, single submitter	VCV000916587	12	13720138	12	13567204	916587	904919
NM_000834.4(GRIN2B):c.2422G>A (p.Val808Ile)	GRIN2B	V808I	Mental retardation, autosomal dominant 6|Epileptic encephalopathy, early infantile, 27	Uncertain significance(Last reviewed: Apr 20, 2018)	criteria provided, single submitter	VCV000562202	12	13720135	12	13567201	562202	553385	rs1565455923
NM_000834.4(GRIN2B):c.2429G>A (p.Ser810Asn)	GRIN2B	S810N	Mental retardation, autosomal dominant 6|Epileptic encephalopathy, early infantile, 27	Likely pathogenic(Last reviewed: Apr 4, 2017)	criteria provided, single submitter	VCV000800894	12	13720128	12	13567194	800894	788865	rs1591609136
NM_000834.4(GRIN2B):c.2430C>A (p.Ser810Arg)	GRIN2B	S810R	Mental retardation, autosomal dominant 6|not provided	Pathogenic(Last reviewed: Apr 4, 2017)	criteria provided, multiple submitters, no conflicts	VCV000218471	12	13720127	12	13567193	218471	215446	rs864309560
NM_000834.5(GRIN2B):c.2434C>T (p.Gln812Ter)	GRIN2B	Q812*	Mental retardation, autosomal dominant 6	Pathogenic(Last reviewed: Jul 3, 2020)	criteria provided, single submitter	VCV000979182	12	13720123	12	13567189	979182	967276
NM_000834.5(GRIN2B):c.2437C>G (p.Leu813Val)	GRIN2B	L813V	Mental retardation, autosomal dominant 6	Likely pathogenic(Last reviewed: Jan 1, 2020)	criteria provided, single submitter	VCV000864861	12	13720120	12	13567186	864861	855108
NM_000834.4(GRIN2B):c.2450A>G (p.Asn817Ser)	GRIN2B	N817S	Epileptic encephalopathy, early infantile, 27|not provided	Conflicting interpretations of pathogenicity(Last reviewed: Jun 1, 2018)	criteria provided, conflicting interpretations	VCV000546556	12	13720107	12	13567173	546556	536833	rs1555103159
NM_000834.4(GRIN2B):c.2452A>C (p.Met818Leu)	GRIN2B	M818L	Mental retardation, autosomal dominant 6|not provided	Likely pathogenic(Last reviewed: Apr 4, 2017)	criteria provided, multiple submitters, no conflicts	VCV000234546	12	13720105	12	13567171	234546	231837	rs876661076
NM_000834.4(GRIN2B):c.2453T>G (p.Met818Arg)	GRIN2B	M818R	Epileptic encephalopathy, early infantile, 27|Mental retardation, autosomal dominant 6	Uncertain significance(Last reviewed: Nov 27, 2016)	criteria provided, single submitter	VCV000411110	12	13720104	12	13567170	411110	399332	rs879254016
NM_000834.4(GRIN2B):c.2453T>C (p.Met818Thr)	GRIN2B	M818T	not specified|Mental retardation, autosomal dominant 6	Conflicting interpretations of pathogenicity(Last reviewed: Apr 4, 2017)	criteria provided, conflicting interpretations	VCV000245960	12	13720104	12	13567170	245960	244795	rs879254016
NM_000834.5(GRIN2B):c.2455G>A (p.Ala819Thr)	GRIN2B	A819T	Mental retardation, autosomal dominant 6|Epileptic encephalopathy, early infantile, 27	Pathogenic/Likely pathogenic(Last reviewed: May 24, 2017)	criteria provided, single submitter	VCV000916592	12	13720102	12	13567168	916592	904918
NM_000834.4(GRIN2B):c.2459G>C (p.Gly820Ala)	GRIN2B	G820A	not provided|Complex neurodevelopmental disorder|Inborn genetic diseases|Mental retardation, autosomal dominant 6|Epileptic encephalopathy, early infantile, 27|Mental retardation, autosomal dominant 6	Pathogenic/Likely pathogenic(Last reviewed: Feb 8, 2019)	criteria provided, multiple submitters, no conflicts	VCV000208643	12	13720098	12	13567164	208643	205273	rs797044849
NM_000834.4(GRIN2B):c.2459G>A (p.Gly820Glu)	GRIN2B	G820E	Epileptic encephalopathy, early infantile, 27|Mental retardation, autosomal dominant 6|Complex neurodevelopmental disorder|Mental retardation, autosomal dominant 6	Conflicting interpretations of pathogenicity(Last reviewed: Apr 13, 2018)	criteria provided, conflicting interpretations	VCV000580700	12	13720098	12	13567164	580700	567934	rs797044849
NM_000834.4(GRIN2B):c.2458G>C (p.Gly820Arg)	GRIN2B	G820R	not provided	Pathogenic(Last reviewed: May 23, 2018)	criteria provided, single submitter	VCV000546296	12	13720099	12	13567165	546296	536832	rs1555103150
NM_000834.4(GRIN2B):c.2458G>A (p.Gly820Arg)	GRIN2B	G820R	Inborn genetic diseases|not provided	Pathogenic/Likely pathogenic(Last reviewed: Oct 23, 2020)	criteria provided, multiple submitters, no conflicts	VCV000521172	12	13720099	12	13567165	521172	511981	rs1555103150
NM_000834.4(GRIN2B):c.2459G>T (p.Gly820Val)	GRIN2B	G820V	Mental retardation, autosomal dominant 6|not provided	Pathogenic/Likely pathogenic(Last reviewed: Apr 4, 2017)	criteria provided, multiple submitters, no conflicts	VCV000234635	12	13720098	12	13567164	234635	231836	rs797044849
NM_000834.5(GRIN2B):c.2461G>T (p.Val821Phe)	GRIN2B	V821F	Complex neurodevelopmental disorder	Pathogenic(Last reviewed: Feb 27, 2018)	no assertion criteria provided	VCV000984853	12	13720096	12	13567162	984853	972961
NM_000834.4(GRIN2B):c.2471T>G (p.Met824Arg)	GRIN2B	M824R	Mental retardation, autosomal dominant 6	Conflicting interpretations of pathogenicity(Last reviewed: Sep 1, 2017)	criteria provided, conflicting interpretations	VCV000561027	12	13720086	12	13567152	561027	552155	rs1565455878
NM_000834.5(GRIN2B):c.2473T>G (p.Leu825Val)	GRIN2B	L825V	Mental retardation, autosomal dominant 6	Likely pathogenic(Last reviewed: Apr 4, 2017)	criteria provided, single submitter	VCV000916593	12	13720084	12	13567150	916593	904917
NM_000834.4(GRIN2B):c.2477G>A (p.Gly826Glu)	GRIN2B	G826E	not provided|Mental retardation, autosomal dominant 6|Complex neurodevelopmental disorder	Pathogenic/Likely pathogenic(Last reviewed: May 24, 2018)	criteria provided, multiple submitters, no conflicts	VCV000421209	12	13720080	12	13567146	421209	408604	rs1064794979
NM_000834.5(GRIN2B):c.2480C>A (p.Ala827Glu)	GRIN2B	A827E	Epileptic encephalopathy, early infantile, 27|Mental retardation, autosomal dominant 6	Uncertain significance(Last reviewed: Mar 22, 2019)	criteria provided, single submitter	VCV000840512	12	13720077	12	13567143	840512	839710
NM_000834.5(GRIN2B):c.2479G>A (p.Ala827Thr)	GRIN2B	A827T	Mental retardation, autosomal dominant 6|Epileptic encephalopathy, early infantile, 27	Uncertain significance(Last reviewed: Jul 10, 2020)	criteria provided, single submitter	VCV001064326	12	13720078	12	13567144	1064326	1047818
NM_000834.5(GRIN2B):c.2486dup (p.Met829fs)	GRIN2B	M829fs	not provided	Likely pathogenic(Last reviewed: Feb 15, 2019)	criteria provided, single submitter	VCV000817463	12	13720070 - 13720071	12	13567136 - 13567137	817463	805733	rs1591609065
NM_000834.4(GRIN2B):c.2510T>C (p.Ile837Thr)	GRIN2B	I837T	Seizures|Epileptic encephalopathy, early infantile, 27|Mental retardation, autosomal dominant 6|Epileptic encephalopathy, early infantile, 27	Uncertain significance(Last reviewed: Jan 1, 2019)	criteria provided, multiple submitters, no conflicts	VCV000560646	12	13720047	12	13567113	560646	551720	rs1565455844
NM_000834.4(GRIN2B):c.2515G>A (p.Glu839Lys)	GRIN2B	E839K	not provided|Complex neurodevelopmental disorder|Intellectual disability	Likely pathogenic(Last reviewed: Sep 10, 2020)	criteria provided, multiple submitters, no conflicts	VCV000426296	12	13720042	12	13567108	426296	415325	rs1085307547
NM_000834.4(GRIN2B):c.2530T>C (p.Trp844Arg)	GRIN2B	W844R	Mental retardation, autosomal dominant 6|Epileptic encephalopathy, early infantile, 27|not specified	Conflicting interpretations of pathogenicity(Last reviewed: Mar 6, 2020)	criteria provided, conflicting interpretations	VCV000373402	12	13720027	12	13567093	373402	360033	rs138088984
NM_000834.4(GRIN2B):c.2539C>T (p.Arg847Ter)	GRIN2B	R847*	Epileptic encephalopathy, early infantile, 27|Mental retardation, autosomal dominant 6|Complex neurodevelopmental disorder|Mental retardation, autosomal dominant 6|not provided	Pathogenic/Likely pathogenic(Last reviewed: Jun 5, 2019)	criteria provided, multiple submitters, no conflicts	VCV000245756	12	13720018	12	13567084	245756	244793	rs879253931
NM_000834.4(GRIN2B):c.2540G>A (p.Arg847Gln)	GRIN2B	R847Q	Mental retardation, autosomal dominant 6|Epileptic encephalopathy, early infantile, 27	Uncertain significance(Last reviewed: Sep 18, 2018)	criteria provided, single submitter	VCV000656203	12	13720017	12	13567083	656203	641000	rs1591608943
NM_000834.4(GRIN2B):c.2543A>G (p.His848Arg)	GRIN2B	H848R	not provided	Uncertain significance(Last reviewed: Sep 1, 2016)	criteria provided, single submitter	VCV000425000	12	13720014	12	13567080	425000	413334	rs1064797166
NM_000834.5(GRIN2B):c.2555G>C (p.Gly852Ala)	GRIN2B	G852A	Epileptic encephalopathy, early infantile, 27|Mental retardation, autosomal dominant 6	Likely pathogenic(Last reviewed: May 8, 2019)	no assertion criteria provided	VCV000827797	12	13720002	12	13567068	827797	815997	rs1168374610
NM_000834.4(GRIN2B):c.2555_2556GT[1] (p.Val853fs)	GRIN2B	V853fs	not provided	Uncertain significance(Last reviewed: Mar 9, 2016)	criteria provided, single submitter	VCV000234441	12	13719999 - 13720000	12	13567065 - 13567066	234441	231835	rs876661022
NM_000834.4(GRIN2B):c.2561G>T (p.Cys854Phe)	GRIN2B	C854F	Mental retardation, autosomal dominant 6|Epileptic encephalopathy, early infantile, 27	Likely benign(Last reviewed: Mar 6, 2020)	criteria provided, single submitter	VCV000655676	12	13719996	12	13567062	655676	640999	rs758762096
NM_000834.4(GRIN2B):c.2560del (p.Cys854fs)	GRIN2B	C854fs	Mental retardation, autosomal dominant 6|Epileptic encephalopathy, early infantile, 27	Pathogenic(Last reviewed: Mar 24, 2017)	criteria provided, single submitter	VCV000619997	12	13719997	12	13567063	619997	611410
NM_000834.4(GRIN2B):c.2589del (p.Ile864fs)	GRIN2B	I864fs	not provided|Mental retardation, autosomal dominant 6	Conflicting interpretations of pathogenicity(Last reviewed: Apr 4, 2017)	criteria provided, conflicting interpretations	VCV000205721	12	13719968	12	13567034	205721	202666	rs796052578
NM_000834.5(GRIN2B):c.2627C>T (p.Ala876Val)	GRIN2B	A876V	not provided	Uncertain significance	no assertion criteria provided	VCV001049874	12	13717545	12	13564611	1049874	1038140
NM_000834.5(GRIN2B):c.2638C>T (p.Arg880Cys)	GRIN2B	R880C	Epileptic encephalopathy, early infantile, 27|Mental retardation, autosomal dominant 6	Uncertain significance(Last reviewed: Jul 10, 2019)	criteria provided, single submitter	VCV000960248	12	13717534	12	13564600	960248	947922
NM_000834.5(GRIN2B):c.2639G>A (p.Arg880His)	GRIN2B	R880H	Epileptic encephalopathy, early infantile, 27|Mental retardation, autosomal dominant 6|Seizures|Intellectual disability	Uncertain significance(Last reviewed: Mar 20, 2020)	criteria provided, multiple submitters, no conflicts	VCV000983359	12	13717533	12	13564599	983359	971450
NM_000834.5(GRIN2B):c.2644T>G (p.Ser882Ala)	GRIN2B	S882A	Epileptic encephalopathy, early infantile, 27|Mental retardation, autosomal dominant 6	Uncertain significance(Last reviewed: Sep 11, 2019)	criteria provided, single submitter	VCV000944626	12	13717528	12	13564594	944626	926578
NM_000834.5(GRIN2B):c.2648T>C (p.Val883Ala)	GRIN2B	V883A	Mental retardation, autosomal dominant 6|Epileptic encephalopathy, early infantile, 27	Benign(Last reviewed: Jul 4, 2019)	criteria provided, single submitter	VCV000833831	12	13717524	12	13564590	833831	822060
NM_000834.4(GRIN2B):c.2662A>G (p.Thr888Ala)	GRIN2B	T888A	Epileptic encephalopathy, early infantile, 27|Mental retardation, autosomal dominant 6|not provided	Conflicting interpretations of pathogenicity(Last reviewed: Feb 20, 2019)	criteria provided, conflicting interpretations	VCV000234694	12	13717510	12	13564576	234694	231834	rs200256539
NM_000834.5(GRIN2B):c.2708G>A (p.Arg903His)	GRIN2B	R903H	Epileptic encephalopathy, early infantile, 27|Mental retardation, autosomal dominant 6	Likely benign(Last reviewed: Apr 29, 2020)	criteria provided, single submitter	VCV001091915	12	13717464	12	13564530	1091915	1079263
NM_000834.4(GRIN2B):c.2741T>C (p.Val914Ala)	GRIN2B	V914A	not provided	Likely benign(Last reviewed: Jun 15, 2018)	criteria provided, single submitter	VCV000579826	12	13717431	12	13564497	579826	571719	rs1565454741
NM_000834.5(GRIN2B):c.2740G>A (p.Val914Met)	GRIN2B	V914M	Epileptic encephalopathy, early infantile, 27|Mental retardation, autosomal dominant 6	Uncertain significance(Last reviewed: Aug 2, 2020)	criteria provided, single submitter	VCV001024769	12	13717432	12	13564498	1024769	1010296
NM_000834.4(GRIN2B):c.2750C>T (p.Ser917Leu)	GRIN2B	S917L	not provided	Likely pathogenic(Last reviewed: Mar 1, 2018)	criteria provided, single submitter	VCV000546700	12	13717422	12	13564488	546700	537189	rs1555102552
NM_000834.5(GRIN2B):c.2755C>T (p.Gln919Ter)	GRIN2B	Q919*	Mental retardation, autosomal dominant 6|Epileptic encephalopathy, early infantile, 27	Likely pathogenic(Last reviewed: Aug 29, 2019)	criteria provided, single submitter	VCV000956942	12	13717417	12	13564483	956942	947921
NM_000834.5(GRIN2B):c.2755C>A (p.Gln919Lys)	GRIN2B	Q919K	Epileptic encephalopathy, early infantile, 27|Mental retardation, autosomal dominant 6	Uncertain significance(Last reviewed: Apr 8, 2019)	criteria provided, single submitter	VCV000851821	12	13717417	12	13564483	851821	839709
NM_000834.4(GRIN2B):c.2759G>A (p.Ser920Asn)	GRIN2B	S920N	not provided	Uncertain significance(Last reviewed: Dec 1, 2016)	criteria provided, single submitter	VCV000373655	12	13717413	12	13564479	373655	360101	rs781442804
NM_000834.5(GRIN2B):c.2761G>C (p.Ala921Pro)	GRIN2B	A921P	Epileptic encephalopathy, early infantile, 27|Mental retardation, autosomal dominant 6	Uncertain significance(Last reviewed: Feb 17, 2020)	criteria provided, single submitter	VCV001016907	12	13717411	12	13564477	1016907	1010294
NM_000834.5(GRIN2B):c.2761G>A (p.Ala921Thr)	GRIN2B	A921T	Mental retardation, autosomal dominant 6|Epileptic encephalopathy, early infantile, 27	Uncertain significance(Last reviewed: Oct 6, 2020)	criteria provided, single submitter	VCV001019289	12	13717411	12	13564477	1019289	1010295
NM_000834.5(GRIN2B):c.2776C>T	GRIN2B	R926*	Complex neurodevelopmental disorder|Inborn genetic diseases	Likely pathogenic(Last reviewed: Aug 27, 2018)	criteria provided, single submitter	VCV000521816	12	13717396	12	13564462	521816	511980	rs1555102536
NM_000834.5(GRIN2B):c.2780G>A (p.Arg927Gln)	GRIN2B	R927Q	Mental retardation, autosomal dominant 6|Epileptic encephalopathy, early infantile, 27	Uncertain significance(Last reviewed: Dec 8, 2019)	criteria provided, single submitter	VCV000847540	12	13717392	12	13564458	847540	839708
NM_000834.5(GRIN2B):c.2791G>A (p.Val931Ile)	GRIN2B	V931I	Mental retardation, autosomal dominant 6|Epileptic encephalopathy, early infantile, 27	Uncertain significance(Last reviewed: Jul 24, 2020)	criteria provided, single submitter	VCV001036863	12	13717381	12	13564447	1036863	1030821
NM_000834.4(GRIN2B):c.2810A>G (p.His937Arg)	GRIN2B	H937R	History of neurodevelopmental disorder|Mental retardation, autosomal dominant 6|Epileptic encephalopathy, early infantile, 27|not specified	Uncertain significance(Last reviewed: Oct 9, 2020)	criteria provided, multiple submitters, no conflicts	VCV000435388	12	13717362	12	13564428	435388	429410	rs1168893427
NM_000834.4(GRIN2B):c.2813G>A (p.Arg938His)	GRIN2B	R938H	Epileptic encephalopathy, early infantile, 27|Mental retardation, autosomal dominant 6|not specified	Likely benign(Last reviewed: Nov 19, 2020)	criteria provided, multiple submitters, no conflicts	VCV000388312	12	13717359	12	13564425	388312	373105	rs150445188
NM_000834.5(GRIN2B):c.2825C>T (p.Thr942Met)	GRIN2B	T942M	Epileptic encephalopathy, early infantile, 27|Mental retardation, autosomal dominant 6	Likely benign(Last reviewed: Apr 8, 2020)	criteria provided, single submitter	VCV001093096	12	13717347	12	13564413	1093096	1079262
NM_000834.5(GRIN2B):c.2834_2837dup (p.Cys946Ter)	GRIN2B	C946*	Mental retardation, autosomal dominant 6|Epileptic encephalopathy, early infantile, 27	Uncertain significance(Last reviewed: Oct 23, 2019)	criteria provided, single submitter	VCV000971807	12	13717334 - 13717335	12	13564400 - 13564401	971807	956824
NM_000834.4(GRIN2B):c.2845T>C (p.Tyr949His)	GRIN2B	Y949H	Complex neurodevelopmental disorder|not provided	Uncertain significance(Last reviewed: Nov 19, 2017)	criteria provided, single submitter	VCV000595099	12	13717327	12	13564393	595099	586161	rs201982602
NM_000834.5(GRIN2B):c.2854C>G (p.Pro952Ala)	GRIN2B	P952A	Mental retardation, autosomal dominant 6|Epileptic encephalopathy, early infantile, 27	Uncertain significance(Last reviewed: Aug 11, 2019)	criteria provided, single submitter	VCV000948230	12	13717318	12	13564384	948230	926577
NM_000834.5(GRIN2B):c.2855C>T (p.Pro952Leu)	GRIN2B	P952L	Mental retardation, autosomal dominant 6|Epileptic encephalopathy, early infantile, 27	Uncertain significance(Last reviewed: Oct 28, 2019)	criteria provided, single submitter	VCV000968910	12	13717317	12	13564383	968910	956823
NM_000834.4(GRIN2B):c.2854C>T (p.Pro952Ser)	GRIN2B	P952S	Mental retardation, autosomal dominant 6|Epileptic encephalopathy, early infantile, 27	Uncertain significance(Last reviewed: Dec 24, 2018)	criteria provided, single submitter	VCV000572311	12	13717318	12	13564384	572311	571713	rs1565454641
NM_000834.5(GRIN2B):c.2861G>A (p.Cys954Tyr)	GRIN2B	C954Y	Epileptic encephalopathy, early infantile, 27|Mental retardation, autosomal dominant 6	Uncertain significance(Last reviewed: Jan 31, 2019)	criteria provided, single submitter	VCV000841423	12	13717311	12	13564377	841423	839707
NM_000834.4(GRIN2B):c.2926_2928del (p.Lys976del)	GRIN2B	K976del	Mental retardation, autosomal dominant 6|not provided	Conflicting interpretations of pathogenicity(Last reviewed: Apr 4, 2017)	criteria provided, conflicting interpretations	VCV000234587	12	13717244 - 13717246	12	13564310 - 13564312	234587	231833	rs876661102
NM_000834.4(GRIN2B):c.2931C>G (p.Asp977Glu)	GRIN2B	D977E	not specified|not provided|Epileptic encephalopathy, early infantile, 27|Mental retardation, autosomal dominant 6	Uncertain significance(Last reviewed: Oct 24, 2020)	criteria provided, multiple submitters, no conflicts	VCV000205713	12	13717241	12	13564307	205713	202664	rs147956755
NM_000834.4(GRIN2B):c.2936A>T (p.Asn979Ile)	GRIN2B	N979I	not provided|Mental retardation, autosomal dominant 6|Epileptic encephalopathy, early infantile, 27	Uncertain significance(Last reviewed: May 14, 2018)	criteria provided, multiple submitters, no conflicts	VCV000205714	12	13717236	12	13564302	205714	202663	rs796052574
NM_000834.4(GRIN2B):c.2960A>G (p.His987Arg)	GRIN2B	H987R	Mental retardation, autosomal dominant 6|Epileptic encephalopathy, early infantile, 27	Uncertain significance(Last reviewed: Sep 1, 2017)	criteria provided, single submitter	VCV000544234	12	13717212	12	13564278	544234	527017	rs765183831
NM_000834.5(GRIN2B):c.2969G>A (p.Arg990Gln)	GRIN2B	R990Q	Mental retardation, autosomal dominant 6|Epileptic encephalopathy, early infantile, 27	Uncertain significance(Last reviewed: Aug 18, 2020)	criteria provided, single submitter	VCV001007309	12	13717203	12	13564269	1007309	995067
NM_000834.4(GRIN2B):c.2975A>G (p.His992Arg)	GRIN2B	H992R	Epileptic encephalopathy, early infantile, 27|Mental retardation, autosomal dominant 6	Benign(Last reviewed: Sep 8, 2017)	criteria provided, single submitter	VCV000477995	12	13717197	12	13564263	477995	462052	rs1555102461
NM_000834.5(GRIN2B):c.3004G>C (p.Gly1002Arg)	GRIN2B	G1002R	Mental retardation, autosomal dominant 6|Mental retardation, autosomal dominant 6|Epileptic encephalopathy, early infantile, 27	Uncertain significance(Last reviewed: Jan 8, 2020)	criteria provided, multiple submitters, no conflicts	VCV001009295	12	13717168	12	13564234	1009295	995066
NM_000834.4(GRIN2B):c.3005G>T (p.Gly1002Val)	GRIN2B	G1002V	developmental delay with intractable seizures	Uncertain significance(Last reviewed: Aug 3, 2016)	no assertion criteria provided	VCV000560647	12	13717167	12	13564233	560647	551719	rs773762599
NM_000834.4(GRIN2B):c.3012C>G (p.Tyr1004Ter)	GRIN2B	Y1004*	not provided|Mental retardation, autosomal dominant 6	Conflicting interpretations of pathogenicity(Last reviewed: Apr 4, 2017)	criteria provided, conflicting interpretations	VCV000280553	12	13717160	12	13564226	280553	264518	rs201439880
NM_000834.4(GRIN2B):c.3006_3009dup (p.Tyr1004fs)	GRIN2B	Y1004fs	not provided	Likely pathogenic(Last reviewed: Dec 9, 2016)	criteria provided, single submitter	VCV000373637	12	13717162 - 13717163	12	13564228 - 13564229	373637	360029	rs1057518520
NM_000834.4(GRIN2B):c.3028C>T (p.Pro1010Ser)	GRIN2B	P1010S	Mental retardation, autosomal dominant 6|Epileptic encephalopathy, early infantile, 27|Epileptic encephalopathy, early infantile, 27	Conflicting interpretations of pathogenicity(Last reviewed: Dec 31, 2019)	criteria provided, conflicting interpretations	VCV000572441	12	13717144	12	13564210	572441	565355
NM_000834.5(GRIN2B):c.3040C>A (p.Gln1014Lys)	GRIN2B	Q1014K	not provided	Uncertain significance(Last reviewed: Nov 1, 2018)	criteria provided, single submitter	VCV000806835	12	13717132	12	13564198	806835	796726	rs1555102419
NM_000834.4(GRIN2B):c.3043T>G (p.Ser1015Ala)	GRIN2B	S1015A	Mental retardation, autosomal dominant 6|Epileptic encephalopathy, early infantile, 27	Uncertain significance(Last reviewed: Apr 5, 2018)	criteria provided, single submitter	VCV000580603	12	13717129	12	13564195	580603	571707	rs574130239
NM_000834.4(GRIN2B):c.3047G>A (p.Arg1016Lys)	GRIN2B	R1016K	not provided|History of neurodevelopmental disorder	Conflicting interpretations of pathogenicity(Last reviewed: Sep 25, 2017)	criteria provided, conflicting interpretations	VCV000205715	12	13717125	12	13564191	205715	202662	rs141109968
NM_000834.4(GRIN2B):c.3056G>T (p.Ser1019Ile)	GRIN2B	S1019I	not provided	Uncertain significance(Last reviewed: Dec 2, 2016)	criteria provided, single submitter	VCV000234738	12	13717116	12	13564182	234738	231832	rs200265732
NM_000834.4(GRIN2B):c.3076G>A (p.Gly1026Ser)	GRIN2B	G1026S	History of neurodevelopmental disorder|Mental retardation, autosomal dominant 6|Epileptic encephalopathy, early infantile, 27|not provided|not specified	Conflicting interpretations of pathogenicity(Last reviewed: Jul 1, 2020)	criteria provided, conflicting interpretations	VCV000205716	12	13717096	12	13564162	205716	202661	rs201963596
NM_000834.4(GRIN2B):c.3085_3087TCC[1] (p.Ser1030del)	GRIN2B	S1030del	Epileptic encephalopathy, early infantile, 27|Mental retardation, autosomal dominant 6	Uncertain significance(Last reviewed: Jan 28, 2016)	criteria provided, single submitter	VCV000238193	12	13717082 - 13717084	12	13564148 - 13564150	238193	241529	rs878854145
NM_000834.4(GRIN2B):c.3099C>G (p.Ser1033Arg)	GRIN2B	S1033R	not provided	Uncertain significance(Last reviewed: Apr 1, 2014)	criteria provided, single submitter	VCV000205717	12	13717073	12	13564139	205717	202660	rs796052575
NM_000834.4(GRIN2B):c.3102G>C (p.Gln1034His)	GRIN2B	Q1034H	Mental retardation, autosomal dominant 6|Epileptic encephalopathy, early infantile, 27	Uncertain significance(Last reviewed: Aug 5, 2018)	criteria provided, single submitter	VCV000649385	12	13717070	12	13564136	649385	640998	rs1204745546
NM_000834.4(GRIN2B):c.3111C>A (p.Asp1037Glu)	GRIN2B	D1037E	not provided	Likely benign(Last reviewed: Jun 14, 2018)	criteria provided, single submitter	VCV000671784	12	13717061	12	13564127	671784	656123	rs754878801
NM_000834.4(GRIN2B):c.3118G>A (p.Gly1040Ser)	GRIN2B	G1040S	Mental retardation, autosomal dominant 6|Epileptic encephalopathy, early infantile, 27	Uncertain significance(Last reviewed: Jan 3, 2018)	criteria provided, multiple submitters, no conflicts	VCV000544228	12	13717054	12	13564120	544228	527021	rs202222002
NM_000834.5(GRIN2B):c.3127T>G (p.Ser1043Ala)	GRIN2B	S1043A	Epileptic encephalopathy, early infantile, 27|Mental retardation, autosomal dominant 6	Uncertain significance(Last reviewed: Jul 27, 2019)	criteria provided, single submitter	VCV000953569	12	13717045	12	13564111	953569	947920
NM_000834.4(GRIN2B):c.3137G>T (p.Ser1046Ile)	GRIN2B	S1046I	not provided	Uncertain significance(Last reviewed: Jul 28, 2017)	criteria provided, single submitter	VCV000246124	12	13717035	12	13564101	246124	244790	rs201029083
NM_000834.5(GRIN2B):c.3141C>A (p.Asp1047Glu)	GRIN2B	D1047E	Epileptic encephalopathy, early infantile, 27|Mental retardation, autosomal dominant 6	Uncertain significance(Last reviewed: Jan 20, 2020)	criteria provided, single submitter	VCV000964766	12	13717031	12	13564097	964766	956822
NM_000834.5(GRIN2B):c.3140A>G (p.Asp1047Gly)	GRIN2B	D1047G	Mental retardation, autosomal dominant 6	Uncertain significance(Last reviewed: Sep 9, 2020)	criteria provided, single submitter	VCV000979172	12	13717032	12	13564098	979172	967250
NM_000834.5(GRIN2B):c.3142C>G (p.Arg1048Gly)	GRIN2B	R1048G	Epileptic encephalopathy, early infantile, 27|Mental retardation, autosomal dominant 6	Uncertain significance(Last reviewed: Feb 7, 2020)	criteria provided, single submitter	VCV000938469	12	13717030	12	13564096	938469	936040
NM_000834.4(GRIN2B):c.3146A>G (p.Tyr1049Cys)	GRIN2B	Y1049C	not provided|Mental retardation, autosomal dominant 6|Epileptic encephalopathy, early infantile, 27	Likely benign(Last reviewed: Jul 24, 2018)	criteria provided, single submitter	VCV000477996	12	13717026	12	13564092	477996	462050	rs201866998
NM_000834.4(GRIN2B):c.3170G>A (p.Arg1057His)	GRIN2B	R1057H	not provided	Uncertain significance(Last reviewed: Jun 29, 2017)	criteria provided, single submitter	VCV000450289	12	13717002	12	13564068	450289	444950	rs773737239
NM_000834.4(GRIN2B):c.3200C>T (p.Thr1067Ile)	GRIN2B	T1067I	not provided	Uncertain significance(Last reviewed: Aug 9, 2017)	criteria provided, single submitter	VCV000451291	12	13716972	12	13564038	451291	444949	rs1555102353
NM_000834.4(GRIN2B):c.3202G>A (p.Val1068Ile)	GRIN2B	V1068I	Epileptic encephalopathy, early infantile, 27|Mental retardation, autosomal dominant 6	Uncertain significance(Last reviewed: Aug 10, 2018)	criteria provided, single submitter	VCV000565631	12	13716970	12	13564036	565631	567929	rs749434579
NM_000834.4(GRIN2B):c.3210T>A (p.Tyr1070Ter)	GRIN2B	Y1070*	Mental retardation, autosomal dominant 6	Pathogenic(Last reviewed: May 28, 2019)	criteria provided, single submitter	VCV000802821	12	13716962	12	13564028	802821	791215	rs1591606580
NM_000834.4(GRIN2B):c.3241C>A (p.Arg1081Ser)	GRIN2B	R1081S	not provided	Uncertain significance(Last reviewed: Aug 31, 2016)	criteria provided, single submitter	VCV000205718	12	13716931	12	13563997	205718	202659	rs796052576
NM_000834.5(GRIN2B):c.3253T>C (p.Tyr1085His)	GRIN2B	Y1085H	Mental retardation, autosomal dominant 6|Epileptic encephalopathy, early infantile, 27	Likely benign(Last reviewed: Apr 12, 2019)	criteria provided, single submitter	VCV000833823	12	13716919	12	13563985	833823	822059
NM_000834.4(GRIN2B):c.3275G>A (p.Arg1092Gln)	GRIN2B	R1092Q	Epileptic encephalopathy, early infantile, 27|Mental retardation, autosomal dominant 6	Likely benign(Last reviewed: Dec 31, 2019)	criteria provided, single submitter	VCV000477997	12	13716897	12	13563963	477997	462315	rs1555102321
NM_000834.5(GRIN2B):c.3284C>T (p.Ser1095Leu)	GRIN2B	S1095L	Mental retardation, autosomal dominant 6	Uncertain significance(Last reviewed: Oct 13, 2020)	criteria provided, single submitter	VCV000995413	12	13716888	12	13563954	995413	983304
NM_000834.5(GRIN2B):c.3295del (p.Arg1099fs)	GRIN2B	R1099fs	Mental retardation, autosomal dominant 6	Uncertain significance(Last reviewed: Apr 4, 2017)	criteria provided, single submitter	VCV000916605	12	13716877	12	13563943	916605	904916
NM_000834.4(GRIN2B):c.3301G>T (p.Glu1101Ter)	GRIN2B	E1101*	not provided	Uncertain significance(Last reviewed: Apr 11, 2016)	criteria provided, single submitter	VCV000488887	12	13716871	12	13563937	488887	482015	rs1555102308
NM_000834.4(GRIN2B):c.3332G>A (p.Arg1111His)	GRIN2B	R1111H	not provided|Mental retardation, autosomal dominant 6|Epileptic encephalopathy, early infantile, 27|Mental retardation, autosomal dominant 6	Conflicting interpretations of pathogenicity(Last reviewed: Mar 13, 2019)	criteria provided, conflicting interpretations	VCV000234696	12	13716840	12	13563906	234696	231831	rs876661167
NM_000834.4(GRIN2B):c.3335G>A (p.Arg1112Gln)	GRIN2B	R1112Q	History of neurodevelopmental disorder|Mental retardation, autosomal dominant 6|Epileptic encephalopathy, early infantile, 27	Conflicting interpretations of pathogenicity(Last reviewed: Jun 1, 2020)	criteria provided, conflicting interpretations	VCV000588926	12	13716837	12	13563903	588926	579772	rs557670363
NM_000834.5(GRIN2B):c.3338C>T (p.Pro1113Leu)	GRIN2B	P1113L	Mental retardation, autosomal dominant 6|Epileptic encephalopathy, early infantile, 27	Uncertain significance(Last reviewed: Jan 26, 2019)	criteria provided, single submitter	VCV000859301	12	13716834	12	13563900	859301	839705
NM_000834.5(GRIN2B):c.3340C>T (p.Pro1114Ser)	GRIN2B	P1114S	Epileptic encephalopathy, early infantile, 27|Mental retardation, autosomal dominant 6	Uncertain significance(Last reviewed: Jul 21, 2020)	criteria provided, single submitter	VCV001055236	12	13716832	12	13563898	1055236	1047817
NM_000834.5(GRIN2B):c.3343C>G (p.Arg1115Gly)	GRIN2B	R1115G	Mental retardation, autosomal dominant 6|Epileptic encephalopathy, early infantile, 27	Uncertain significance(Last reviewed: Oct 23, 2020)	criteria provided, single submitter	VCV001018635	12	13716829	12	13563895	1018635	1010293
NM_000834.5(GRIN2B):c.3343C>A (p.Arg1115Ser)	GRIN2B	R1115S	Epileptic encephalopathy, early infantile, 27|Mental retardation, autosomal dominant 6	Likely benign(Last reviewed: Feb 10, 2020)	criteria provided, single submitter	VCV000944416	12	13716829	12	13563895	944416	926576
NM_000834.5(GRIN2B):c.3365A>G (p.Tyr1122Cys)	GRIN2B	Y1122C	Mental retardation, autosomal dominant 6|Epileptic encephalopathy, early infantile, 27	Uncertain significance(Last reviewed: May 27, 2019)	criteria provided, single submitter	VCV000858828	12	13716807	12	13563873	858828	839704
NM_000834.4(GRIN2B):c.3367T>C (p.Phe1123Leu)	GRIN2B	F1123L	Mental retardation, autosomal dominant 6|Epileptic encephalopathy, early infantile, 27	Uncertain significance(Last reviewed: Oct 16, 2018)	criteria provided, single submitter	VCV000654036	12	13716805	12	13563871	654036	640997	rs1591606392
NM_000834.5(GRIN2B):c.3383G>A (p.Gly1128Glu)	GRIN2B	G1128E	Epileptic encephalopathy, early infantile, 27|Mental retardation, autosomal dominant 6	Uncertain significance(Last reviewed: Oct 16, 2020)	criteria provided, single submitter	VCV001044908	12	13716789	12	13563855	1044908	1030820
NM_000834.5(GRIN2B):c.3389G>T (p.Arg1130Leu)	GRIN2B	R1130L	Mental retardation, autosomal dominant 6|Epileptic encephalopathy, early infantile, 27	Benign(Last reviewed: Sep 10, 2019)	criteria provided, single submitter	VCV000833657	12	13716783	12	13563849	833657	822058
NM_000834.4(GRIN2B):c.3389G>A (p.Arg1130Gln)	GRIN2B	R1130Q	Mental retardation, autosomal dominant 6|Epileptic encephalopathy, early infantile, 27|not specified	Likely benign(Last reviewed: Dec 31, 2019)	criteria provided, multiple submitters, no conflicts	VCV000245688	12	13716783	12	13563849	245688	244787	rs148625092
NM_000834.5(GRIN2B):c.3388C>T (p.Arg1130Trp)	GRIN2B	R1130W	Epileptic encephalopathy, early infantile, 27	Likely pathogenic(Last reviewed: Jun 17, 2019)	criteria provided, single submitter	VCV001028884	12	13716784	12	13563850	1028884	1017588
NM_000834.5(GRIN2B):c.3400_3416del (p.Leu1134fs)	GRIN2B	L1134fs	Mental retardation, autosomal dominant 6|Epileptic encephalopathy, early infantile, 27	Uncertain significance(Last reviewed: Oct 18, 2019)	criteria provided, single submitter	VCV000940412	12	13716756 - 13716772	12	13563822 - 13563838	940412	936039
NM_000834.4(GRIN2B):c.3400C>G (p.Leu1134Val)	GRIN2B	L1134V	Mental retardation, autosomal dominant 6|Epileptic encephalopathy, early infantile, 27	Uncertain significance(Last reviewed: Jun 4, 2018)	criteria provided, single submitter	VCV000572639	12	13716772	12	13563838	572639	566738	rs979079013
NM_000834.4(GRIN2B):c.3409T>A (p.Phe1137Ile)	GRIN2B	F1137I	Epileptic encephalopathy, early infantile, 27|Mental retardation, autosomal dominant 6	Uncertain significance(Last reviewed: Dec 9, 2017)	criteria provided, single submitter	VCV000411108	12	13716763	12	13563829	411108	398867	rs1060503159
NM_000834.4(GRIN2B):c.3413G>T (p.Arg1138Leu)	GRIN2B	R1138L	Epileptic encephalopathy, early infantile, 27|Mental retardation, autosomal dominant 6|not provided	Uncertain significance(Last reviewed: Sep 27, 2019)	criteria provided, multiple submitters, no conflicts	VCV000234693	12	13716759	12	13563825	234693	231830	rs187979330
NM_000834.4(GRIN2B):c.3413G>A (p.Arg1138Gln)	GRIN2B	R1138Q	not provided	Likely benign(Last reviewed: Apr 23, 2018)	criteria provided, single submitter	VCV000735755	12	13716759	12	13563825	735755	753259	rs187979330
NM_000834.4(GRIN2B):c.3415A>G (p.Thr1139Ala)	GRIN2B	T1139A	Mental retardation, autosomal dominant 6|Epileptic encephalopathy, early infantile, 27	Uncertain significance(Last reviewed: Jan 22, 2018)	criteria provided, single submitter	VCV000572972	12	13716757	12	13563823	572972	565352	rs200237781
NM_000834.5(GRIN2B):c.3416C>A (p.Thr1139Lys)	GRIN2B	T1139K	Mental retardation, autosomal dominant 6|Epileptic encephalopathy, early infantile, 27	Uncertain significance(Last reviewed: Mar 21, 2019)	criteria provided, single submitter	VCV000855293	12	13716756	12	13563822	855293	839703
NM_000834.4(GRIN2B):c.3470A>G (p.Glu1157Gly)	GRIN2B	E1157G	Epileptic encephalopathy, early infantile, 27	Uncertain significance(Last reviewed: Jun 8, 2018)	criteria provided, single submitter	VCV000560713	12	13716702	12	13563768	560713	551786	rs1565453853
NM_000834.4(GRIN2B):c.3473G>C (p.Arg1158Pro)	GRIN2B	R1158P	Epileptic encephalopathy, early infantile, 27|Mental retardation, autosomal dominant 6	Uncertain significance(Last reviewed: Aug 28, 2018)	criteria provided, single submitter	VCV000646735	12	13716699	12	13563765	646735	640996	rs143955920
NM_000834.5(GRIN2B):c.3473G>A (p.Arg1158Gln)	GRIN2B	R1158Q	Mental retardation, autosomal dominant 6|Epileptic encephalopathy, early infantile, 27	Benign(Last reviewed: Mar 18, 2020)	criteria provided, single submitter	VCV000864752	12	13716699	12	13563765	864752	839702
NM_000834.4(GRIN2B):c.3493G>A (p.Asp1165Asn)	GRIN2B	D1165N	Epileptic encephalopathy, early infantile, 27|Mental retardation, autosomal dominant 6	Uncertain significance(Last reviewed: Mar 29, 2017)	criteria provided, single submitter	VCV000478000	12	13716679	12	13563745	478000	462310	rs769857006
NM_000834.4(GRIN2B):c.3499G>A (p.Val1167Ile)	GRIN2B	V1167I	Epileptic encephalopathy, early infantile, 27|Mental retardation, autosomal dominant 6|not specified	Uncertain significance(Last reviewed: Nov 3, 2019)	criteria provided, multiple submitters, no conflicts	VCV000245684	12	13716673	12	13563739	245684	244785	rs1042339
NM_000834.4(GRIN2B):c.3505G>A (p.Gly1169Arg)	GRIN2B	G1169R	Mental retardation, autosomal dominant 6|Epileptic encephalopathy, early infantile, 27	Uncertain significance(Last reviewed: Nov 22, 2017)	criteria provided, single submitter	VCV000544232	12	13716667	12	13563733	544232	527018	rs777639067
NM_000834.5(GRIN2B):c.3512G>A (p.Gly1171Glu)	GRIN2B	G1171E	Mental retardation, autosomal dominant 6	Uncertain significance(Last reviewed: Feb 19, 2020)	criteria provided, single submitter	VCV000931826	12	13716660	12	13563726	931826	919420
NM_000834.5(GRIN2B):c.3514C>T (p.Pro1172Ser)	GRIN2B	P1172S	Epileptic encephalopathy, early infantile, 27|Mental retardation, autosomal dominant 6	Uncertain significance(Last reviewed: Oct 8, 2020)	criteria provided, single submitter	VCV001058466	12	13716658	12	13563724	1058466	1047816
NM_000834.5(GRIN2B):c.3543C>A (p.His1181Gln)	GRIN2B	H1181Q	Mental retardation, autosomal dominant 6|Epileptic encephalopathy, early infantile, 27	Uncertain significance(Last reviewed: Jun 21, 2020)	criteria provided, single submitter	VCV001041973	12	13716629	12	13563695	1041973	1030819
NM_000834.5(GRIN2B):c.3541C>T (p.His1181Tyr)	GRIN2B	H1181Y	Epileptic encephalopathy, early infantile, 27|Mental retardation, autosomal dominant 6	Uncertain significance(Last reviewed: Aug 16, 2020)	criteria provided, single submitter	VCV001052036	12	13716631	12	13563697	1052036	1047815
NM_000834.4(GRIN2B):c.3562G>A (p.Gly1188Ser)	GRIN2B	G1188S	not provided	not provided	no assertion provided	VCV000098434	12	13716610	12	13563676	98434	104327	rs367543149
NM_000834.5(GRIN2B):c.3601C>G (p.Leu1201Val)	GRIN2B	L1201V	Epileptic encephalopathy, early infantile, 27|Mental retardation, autosomal dominant 6	Uncertain significance(Last reviewed: Sep 24, 2020)	criteria provided, single submitter	VCV001061449	12	13716571	12	13563637	1061449	1047814
NM_000834.4(GRIN2B):c.3626G>A (p.Arg1209Gln)	GRIN2B	R1209Q	not specified	Uncertain significance(Last reviewed: Jun 26, 2015)	criteria provided, single submitter	VCV000245831	12	13716546	12	13563612	245831	244783	rs748005909
NM_000834.5(GRIN2B):c.3638A>T (p.Asn1213Ile)	GRIN2B	N1213I	Paroxysmal dystonia	Likely benign	criteria provided, single submitter	VCV000978813	12	13716534	12	13563600	978813	966891
NM_000834.5(GRIN2B):c.3646C>T (p.Arg1216Cys)	GRIN2B	R1216C	Epileptic encephalopathy, early infantile, 27|Mental retardation, autosomal dominant 6	Uncertain significance(Last reviewed: Aug 30, 2020)	criteria provided, single submitter	VCV001008577	12	13716526	12	13563592	1008577	995065
NM_000834.5(GRIN2B):c.3647G>A (p.Arg1216His)	GRIN2B	R1216H	Epileptic encephalopathy, early infantile, 27|Mental retardation, autosomal dominant 6	Uncertain significance(Last reviewed: May 26, 2020)	criteria provided, single submitter	VCV001023312	12	13716525	12	13563591	1023312	1010292
NM_000834.5(GRIN2B):c.3652T>A (p.Cys1218Ser)	GRIN2B	C1218S	Inborn genetic diseases	Uncertain significance(Last reviewed: Jun 4, 2020)	criteria provided, single submitter	VCV000986115	12	13716520	12	13563586	986115	973833
NM_000834.4(GRIN2B):c.3670_3672del (p.Asn1224del)	GRIN2B	N1224del	Inborn genetic diseases	Uncertain significance(Last reviewed: Nov 2, 2015)	criteria provided, single submitter	VCV000520574	12	13716500 - 13716502	12	13563566 - 13563568	520574	511979	rs1555102005
NM_000834.4(GRIN2B):c.3673T>A (p.Tyr1225Asn)	GRIN2B	Y1225N	not provided	Benign(Last reviewed: Nov 14, 2018)	criteria provided, single submitter	VCV000752647	12	13716499	12	13563565	752647	769024	rs1591605873
NM_000834.4(GRIN2B):c.3683C>T (p.Thr1228Met)	GRIN2B	T1228M	Mental retardation, autosomal dominant 6|Epileptic encephalopathy, early infantile, 27	Uncertain significance(Last reviewed: Oct 20, 2017)	criteria provided, single submitter	VCV000544229	12	13716489	12	13563555	544229	527011	rs75670883
NM_000834.5(GRIN2B):c.3685G>A (p.Val1229Met)	GRIN2B	V1229M	Mental retardation, autosomal dominant 6|Epileptic encephalopathy, early infantile, 27	Uncertain significance(Last reviewed: Jan 31, 2019)	criteria provided, single submitter	VCV000840612	12	13716487	12	13563553	840612	839701
NM_000834.4(GRIN2B):c.3703G>A (p.Gly1235Ser)	GRIN2B	G1235S	Epileptic encephalopathy, early infantile, 27|Mental retardation, autosomal dominant 6|not specified	Uncertain significance(Last reviewed: Oct 20, 2020)	criteria provided, multiple submitters, no conflicts	VCV000307741	12	13716469	12	13563535	307741	316413	rs886049099
NM_000834.5(GRIN2B):c.3702_3705dup (p.Arg1236fs)	GRIN2B	R1236fs	Mental retardation, autosomal dominant 6	Pathogenic(Last reviewed: Jan 1, 2019)	no assertion criteria provided	VCV000975555	12	13716466 - 13716467	12	13563532 - 13563533	975555	963749
NM_000834.4(GRIN2B):c.3745G>T (p.Gly1249Cys)	GRIN2B	G1249C	not provided	Uncertain significance(Last reviewed: Apr 19, 2017)	criteria provided, single submitter	VCV000205719	12	13716427	12	13563493	205719	202657	rs796052577
NM_000834.5(GRIN2B):c.3764G>C (p.Ser1255Thr)	GRIN2B	S1255T	Mental retardation, autosomal dominant 6|Epileptic encephalopathy, early infantile, 27	Uncertain significance(Last reviewed: May 20, 2020)	criteria provided, single submitter	VCV001046597	12	13716408	12	13563474	1046597	1030818
NM_000834.5(GRIN2B):c.3782A>T (p.Gln1261Leu)	GRIN2B	Q1261L	Mental retardation, autosomal dominant 6|Epileptic encephalopathy, early infantile, 27	Uncertain significance(Last reviewed: Sep 18, 2019)	criteria provided, single submitter	VCV000934339	12	13716390	12	13563456	934339	936038
NM_000834.5(GRIN2B):c.3787C>G (p.Leu1263Val)	GRIN2B	L1263V	Mental retardation, autosomal dominant 6|Epileptic encephalopathy, early infantile, 27	Uncertain significance(Last reviewed: Apr 28, 2020)	criteria provided, single submitter	VCV001002367	12	13716385	12	13563451	1002367	995064
NM_000834.4(GRIN2B):c.3797C>T (p.Pro1266Leu)	GRIN2B	P1266L	not specified|Mental retardation, autosomal dominant 6|Epileptic encephalopathy, early infantile, 27	Conflicting interpretations of pathogenicity(Last reviewed: Oct 25, 2020)	criteria provided, conflicting interpretations	VCV000205722	12	13716375	12	13563441	205722	202655	rs201947553
NM_000834.4(GRIN2B):c.3796C>T (p.Pro1266Ser)	GRIN2B	P1266S	Mental retardation, autosomal dominant 6|Epileptic encephalopathy, early infantile, 27	Likely benign(Last reviewed: Sep 8, 2020)	criteria provided, single submitter	VCV000699692	12	13716376	12	13563442	699692	687940	rs199935748
NM_000834.4(GRIN2B):c.3799G>T (p.Ala1267Ser)	GRIN2B	A1267S	not specified|Mental retardation, autosomal dominant 6|Epileptic encephalopathy, early infantile, 27	Benign/Likely benign(Last reviewed: Dec 31, 2019)	criteria provided, multiple submitters, no conflicts	VCV000205732	12	13716373	12	13563439	205732	202654	rs141844705
NM_000834.5(GRIN2B):c.3799G>A (p.Ala1267Thr)	GRIN2B	A1267T	Mental retardation, autosomal dominant 6|Epileptic encephalopathy, early infantile, 27	Uncertain significance(Last reviewed: Nov 16, 2019)	criteria provided, single submitter	VCV000970708	12	13716373	12	13563439	970708	956821
NM_000834.5(GRIN2B):c.3805C>T (p.Pro1269Ser)	GRIN2B	P1269S	Mental retardation, autosomal dominant 6|Epileptic encephalopathy, early infantile, 27	Uncertain significance(Last reviewed: May 20, 2020)	criteria provided, single submitter	VCV001003285	12	13716367	12	13563433	1003285	995063
NM_000834.4(GRIN2B):c.3812C>T (p.Ala1271Val)	GRIN2B	A1271V	not provided	Uncertain significance(Last reviewed: Apr 23, 2015)	criteria provided, single submitter	VCV000245739	12	13716360	12	13563426	245739	244781	rs372379846
NM_000834.4(GRIN2B):c.3818C>A (p.Thr1273Lys)	GRIN2B	T1273K	not specified|Mental retardation, autosomal dominant 6|Epileptic encephalopathy, early infantile, 27	Benign/Likely benign(Last reviewed: Dec 31, 2019)	criteria provided, multiple submitters, no conflicts	VCV000245918	12	13716354	12	13563420	245918	244780	rs531747728
NM_000834.4(GRIN2B):c.3838A>G (p.Lys1280Glu)	GRIN2B	K1280E	Epileptic encephalopathy, early infantile, 27|Mental retardation, autosomal dominant 6	Uncertain significance(Last reviewed: Feb 17, 2020)	criteria provided, single submitter	VCV000663730	12	13716334	12	13563400	663730	640995	rs772502958
NM_000834.5(GRIN2B):c.3851G>T (p.Ser1284Ile)	GRIN2B	S1284I	Mental retardation, autosomal dominant 6|Epileptic encephalopathy, early infantile, 27	Uncertain significance(Last reviewed: Oct 30, 2019)	criteria provided, single submitter	VCV000968312	12	13716321	12	13563387	968312	956820
NM_000834.5(GRIN2B):c.3875A>G (p.Lys1292Arg)	GRIN2B	K1292R	Mental retardation, autosomal dominant 6|Epileptic encephalopathy, early infantile, 27	Uncertain significance(Last reviewed: Oct 28, 2020)	criteria provided, single submitter	VCV001021034	12	13716297	12	13563363	1021034	1010291
NM_000834.4(GRIN2B):c.3881A>C (p.Asn1294Thr)	GRIN2B	N1294T	not provided	Benign(Last reviewed: Aug 21, 2018)	criteria provided, single submitter	VCV000765673	12	13716291	12	13563357	765673	769023	rs1591605604
NM_000834.4(GRIN2B):c.3884G>A (p.Arg1295Gln)	GRIN2B	R1295Q	Inborn genetic diseases	Uncertain significance(Last reviewed: Jun 22, 2016)	criteria provided, single submitter	VCV000521070	12	13716288	12	13563354	521070	511978	rs1284336148
NM_000834.4(GRIN2B):c.3883C>T (p.Arg1295Trp)	GRIN2B	R1295W	not provided	Uncertain significance(Last reviewed: Feb 19, 2016)	criteria provided, single submitter	VCV000246384	12	13716289	12	13563355	246384	244779	rs560662030
NM_000834.4(GRIN2B):c.3886A>C (p.Asn1296His)	GRIN2B	N1296H	Mental retardation, autosomal dominant 6|Epileptic encephalopathy, early infantile, 27	Uncertain significance(Last reviewed: Sep 15, 2017)	criteria provided, single submitter	VCV000544233	12	13716286	12	13563352	544233	527229	rs1555101871
NM_000834.5(GRIN2B):c.3890A>G (p.Lys1297Arg)	GRIN2B	K1297R	not provided	Uncertain significance(Last reviewed: Jan 1, 2019)	criteria provided, single submitter	VCV000806834	12	13716282	12	13563348	806834	796725	rs916745822
NM_000834.4(GRIN2B):c.3893T>C (p.Leu1298Pro)	GRIN2B	L1298P	not provided|Epileptic encephalopathy, early infantile, 27|Mental retardation, autosomal dominant 6	Uncertain significance(Last reviewed: Feb 17, 2020)	criteria provided, multiple submitters, no conflicts	VCV000234583	12	13716279	12	13563345	234583	231829	rs876661100
NM_000834.5(GRIN2B):c.3915dup (p.Thr1306fs)	GRIN2B	T1306fs	not provided	Likely pathogenic(Last reviewed: Sep 13, 2019)	criteria provided, single submitter	VCV000817269	12	13716256 - 13716257	12	13563322 - 13563323	817269	805732	rs1591605549
NM_000834.5(GRIN2B):c.3920T>C (p.Phe1307Ser)	GRIN2B	F1307S	Epileptic encephalopathy, early infantile, 27|Mental retardation, autosomal dominant 6	Likely benign(Last reviewed: Oct 13, 2020)	criteria provided, single submitter	VCV000946594	12	13716252	12	13563318	946594	926575
NM_000834.4(GRIN2B):c.3922G>A (p.Val1308Met)	GRIN2B	V1308M	not provided|Mental retardation, autosomal dominant 6|Epileptic encephalopathy, early infantile, 27|History of neurodevelopmental disorder|Inborn genetic diseases	Conflicting interpretations of pathogenicity(Last reviewed: Dec 31, 2019)	criteria provided, conflicting interpretations	VCV000373230	12	13716250	12	13563316	373230	360082	rs374746622
NM_000834.4(GRIN2B):c.3944C>T (p.Ala1315Val)	GRIN2B	A1315V	Mental retardation, autosomal dominant 6|Epileptic encephalopathy, early infantile, 27	Likely pathogenic(Last reviewed: Jan 7, 2019)	criteria provided, single submitter	VCV000655974	12	13716228	12	13563294	655974	640994	rs1591605514
NM_000834.4(GRIN2B):c.3946G>A (p.Ala1316Thr)	GRIN2B	A1316T	Mental retardation, autosomal dominant 6|Epileptic encephalopathy, early infantile, 27	Uncertain significance(Last reviewed: Oct 12, 2017)	criteria provided, single submitter	VCV000544231	12	13716226	12	13563292	544231	527224	rs199803550
NM_000834.4(GRIN2B):c.3949C>G (p.Leu1317Val)	GRIN2B	L1317V	Intellectual disability	Likely benign(Last reviewed: Jan 1, 2017)	criteria provided, single submitter	VCV000562039	12	13716223	12	13563289	562039	553181
NM_000834.5(GRIN2B):c.3952del (p.Ala1318fs)	GRIN2B	A1318fs	not provided	Pathogenic(Last reviewed: Oct 17, 2018)	criteria provided, single submitter	VCV000817872	12	13716220	12	13563286	817872	805731	rs1591605498
NM_000834.4(GRIN2B):c.3964G>A (p.Val1322Ile)	GRIN2B	V1322I	not specified|not provided	Conflicting interpretations of pathogenicity(Last reviewed: Aug 16, 2018)	criteria provided, conflicting interpretations	VCV000373786	12	13716208	12	13563274	373786	360098	rs200255226
NM_000834.4(GRIN2B):c.3964G>C (p.Val1322Leu)	GRIN2B	V1322L	Epileptic encephalopathy, early infantile, 27|Mental retardation, autosomal dominant 6	Uncertain significance(Last reviewed: Nov 27, 2018)	criteria provided, single submitter	VCV000411109	12	13716208	12	13563274	411109	398865	rs200255226
NM_000834.4(GRIN2B):c.3985C>G (p.Arg1329Gly)	GRIN2B	R1329G	History of neurodevelopmental disorder	Uncertain significance(Last reviewed: May 3, 2016)	criteria provided, single submitter	VCV000589269	12	13716187	12	13563253	589269	579761	rs1555101805
NM_000834.4(GRIN2B):c.3993G>A (p.Met1331Ile)	GRIN2B	M1331I	not specified|Mental retardation, autosomal dominant 6|Epileptic encephalopathy, early infantile, 27|History of neurodevelopmental disorder|not provided	Conflicting interpretations of pathogenicity(Last reviewed: Aug 20, 2020)	criteria provided, conflicting interpretations	VCV000376804	12	13716179	12	13563245	376804	363682	rs200035225
NM_000834.4(GRIN2B):c.4015_4016del (p.Met1339fs)	GRIN2B	M1339fs	Mental retardation, autosomal dominant 6|Epileptic encephalopathy, early infantile, 27|History of neurodevelopmental disorder	Conflicting interpretations of pathogenicity(Last reviewed: Jun 5, 2019)	criteria provided, conflicting interpretations	VCV000588039	12	13716156 - 13716157	12	13563222 - 13563223	588039	579767	rs1565453023
NM_000834.5(GRIN2B):c.4017G>A (p.Met1339Ile)	GRIN2B	M1339I	Epileptic encephalopathy, early infantile, 27|Mental retardation, autosomal dominant 6|Mental retardation, autosomal dominant 6	Uncertain significance(Last reviewed: Jan 16, 2020)	criteria provided, multiple submitters, no conflicts	VCV000855592	12	13716155	12	13563221	855592	839700
NM_000834.5(GRIN2B):c.4031C>T (p.Ala1344Val)	GRIN2B	A1344V	Mental retardation, autosomal dominant 6|Epileptic encephalopathy, early infantile, 27	Uncertain significance(Last reviewed: Jan 25, 2019)	criteria provided, single submitter	VCV000853924	12	13716141	12	13563207	853924	839699
NM_000834.4(GRIN2B):c.4041C>A (p.Ser1347Arg)	GRIN2B	S1347R	Mental retardation, autosomal dominant 6|Epileptic encephalopathy, early infantile, 27|not provided	Uncertain significance(Last reviewed: Sep 11, 2018)	criteria provided, multiple submitters, no conflicts	VCV000307738	12	13716131	12	13563197	307738	323830	rs769147604
NM_000834.5(GRIN2B):c.4049C>T (p.Ala1350Val)	GRIN2B	A1350V	not provided|Mental retardation, autosomal dominant 6|Epileptic encephalopathy, early infantile, 27	Uncertain significance(Last reviewed: Sep 10, 2020)	criteria provided, multiple submitters, no conflicts	VCV000871281	12	13716123	12	13563189	871281	859953
NM_000834.5(GRIN2B):c.4050_4052CAA[2] (p.Asn1352del)	GRIN2B	N1352del	not provided	Uncertain significance(Last reviewed: Aug 1, 2019)	criteria provided, single submitter	VCV000871280	12	13716114 - 13716116	12	13563180 - 13563182	871280	859952
NM_000834.4(GRIN2B):c.4066G>A (p.Val1356Met)	GRIN2B	V1356M	Mental retardation, autosomal dominant 6|Epileptic encephalopathy, early infantile, 27|not provided|History of neurodevelopmental disorder	Conflicting interpretations of pathogenicity(Last reviewed: Oct 19, 2020)	criteria provided, conflicting interpretations	VCV000205724	12	13716106	12	13563172	205724	202652	rs796052579
NM_000834.4(GRIN2B):c.4084_4086CAC[2] (p.His1364del)	GRIN2B	H1364del	Mental retardation, autosomal dominant 6|Epileptic encephalopathy, early infantile, 27|not specified|not provided	Uncertain significance(Last reviewed: Mar 7, 2020)	criteria provided, multiple submitters, no conflicts	VCV000435386	12	13716080 - 13716082	12	13563146 - 13563148	435386	429407	rs1214837315
NM_000834.5(GRIN2B):c.4093AAC[1] (p.Asn1366del)	GRIN2B	N1366del	Epileptic encephalopathy, early infantile, 27|Mental retardation, autosomal dominant 6	Uncertain significance(Last reviewed: Mar 2, 2020)	criteria provided, single submitter	VCV001016454	12	13716074 - 13716076	12	13563140 - 13563142	1016454	1010290
NM_000834.4(GRIN2B):c.4102G>A (p.Gly1368Ser)	GRIN2B	G1368S	not specified	Likely benign(Last reviewed: Dec 21, 2015)	criteria provided, single submitter	VCV000435385	12	13716070	12	13563136	435385	429406	rs1043559346
NM_000834.4(GRIN2B):c.4105G>A (p.Gly1369Ser)	GRIN2B	G1369S	Epileptic encephalopathy, early infantile, 27|Mental retardation, autosomal dominant 6|not specified|not provided	Conflicting interpretations of pathogenicity(Last reviewed: Jul 24, 2019)	criteria provided, conflicting interpretations	VCV000411106	12	13716067	12	13563133	411106	398860	rs371190262
NM_000834.5(GRIN2B):c.4108G>A (p.Gly1370Arg)	GRIN2B	G1370R	Mental retardation, autosomal dominant 6|Epileptic encephalopathy, early infantile, 27	Uncertain significance(Last reviewed: Mar 11, 2020)	criteria provided, single submitter	VCV001010999	12	13716064	12	13563130	1010999	995062
NM_000834.5(GRIN2B):c.4112A>G (p.Tyr1371Cys)	GRIN2B	Y1371C	Mental retardation, autosomal dominant 6|Epileptic encephalopathy, early infantile, 27	Uncertain significance(Last reviewed: Sep 15, 2020)	criteria provided, single submitter	VCV001001488	12	13716060	12	13563126	1001488	995061
NM_000834.4(GRIN2B):c.4142G>A (p.Arg1381Gln)	GRIN2B	R1381Q	not specified	Uncertain significance(Last reviewed: Sep 29, 2015)	criteria provided, single submitter	VCV000245959	12	13716030	12	13563096	245959	244776	rs761443441
NM_000834.4(GRIN2B):c.4168_4169del (p.Thr1390fs)	GRIN2B	T1390fs	not provided	Pathogenic(Last reviewed: Oct 31, 2017)	criteria provided, single submitter	VCV000453166	12	13716003 - 13716004	12	13563069 - 13563070	453166	444948	rs1555101670
NM_000834.5(GRIN2B):c.4172T>C (p.Phe1391Ser)	GRIN2B	F1391S	Inborn genetic diseases	Uncertain significance(Last reviewed: Jul 24, 2018)	criteria provided, single submitter	VCV000985037	12	13716000	12	13563066	985037	973832
NM_000834.4(GRIN2B):c.4196A>G (p.His1399Arg)	GRIN2B	H1399R	Epileptic encephalopathy, early infantile, 27|Mental retardation, autosomal dominant 6	Uncertain significance(Last reviewed: Jun 29, 2018)	criteria provided, single submitter	VCV000567750	12	13715976	12	13563042	567750	566732	rs1565452791
NM_000834.5(GRIN2B):c.4208C>T (p.Ser1403Phe)	GRIN2B	S1403F	not provided	Uncertain significance(Last reviewed: Oct 1, 2019)	criteria provided, single submitter	VCV000871279	12	13715964	12	13563030	871279	859951
NM_000834.4(GRIN2B):c.4229C>T (p.Thr1410Met)	GRIN2B	T1410M	Mental retardation, autosomal dominant 6|Epileptic encephalopathy, early infantile, 27	Benign(Last reviewed: Oct 31, 2019)	criteria provided, single submitter	VCV000577792	12	13715943	12	13563009	577792	567928	rs779830552
NM_000834.5(GRIN2B):c.4229C>G (p.Thr1410Arg)	GRIN2B	T1410R	Mental retardation, autosomal dominant 6|Epileptic encephalopathy, early infantile, 27	Uncertain significance(Last reviewed: Mar 21, 2019)	criteria provided, single submitter	VCV000855066	12	13715943	12	13563009	855066	839698
NM_000834.4(GRIN2B):c.4232T>G (p.Val1411Gly)	GRIN2B	V1411G	not provided	Uncertain significance(Last reviewed: Jun 7, 2017)	criteria provided, single submitter	VCV000502317	12	13715940	12	13563006	502317	493741	rs1555101622
NM_000834.4(GRIN2B):c.4235C>A (p.Ala1412Glu)	GRIN2B	A1412E	not specified	Likely benign(Last reviewed: May 26, 2016)	criteria provided, single submitter	VCV000435384	12	13715937	12	13563003	435384	429405	rs1314346300
NM_000834.4(GRIN2B):c.4240G>T (p.Ala1414Ser)	GRIN2B	A1414S	not specified|History of neurodevelopmental disorder|Mental retardation, autosomal dominant 6|Epileptic encephalopathy, early infantile, 27|not provided	Benign/Likely benign(Last reviewed: Dec 31, 2019)	criteria provided, multiple submitters, no conflicts	VCV000098430	12	13715932	12	13562998	98430	104323	rs140744818
NM_000834.4(GRIN2B):c.4241C>T (p.Ala1414Val)	GRIN2B	A1414V	Mental retardation, autosomal dominant 6|Epileptic encephalopathy, early infantile, 27|not specified	Conflicting interpretations of pathogenicity(Last reviewed: Jun 18, 2020)	criteria provided, conflicting interpretations	VCV000515602	12	13715931	12	13562997	515602	504700	rs751107971
NM_000834.5(GRIN2B):c.4244C>T (p.Ser1415Leu)	GRIN2B	S1415L	Mental retardation, autosomal dominant 6|Epileptic encephalopathy, early infantile, 27	Uncertain significance(Last reviewed: Oct 13, 2020)	criteria provided, single submitter	VCV001005468	12	13715928	12	13562994	1005468	995060
NM_000834.4(GRIN2B):c.4261T>C (p.Phe1421Leu)	GRIN2B	F1421L	not specified	Uncertain significance(Last reviewed: Dec 1, 2015)	criteria provided, single submitter	VCV000246159	12	13715911	12	13562977	246159	244775	rs879254129
NM_000834.4(GRIN2B):c.4265G>A (p.Arg1422Gln)	GRIN2B	R1422Q	not provided	Uncertain significance(Last reviewed: Sep 21, 2017)	criteria provided, single submitter	VCV000451978	12	13715907	12	13562973	451978	444947	rs75269586
NM_000834.5(GRIN2B):c.4268C>T (p.Ala1423Val)	GRIN2B	A1423V	Epileptic encephalopathy, early infantile, 27|Mental retardation, autosomal dominant 6	Uncertain significance(Last reviewed: Mar 4, 2020)	criteria provided, single submitter	VCV001026066	12	13715904	12	13562970	1026066	1010289
NM_000834.4(GRIN2B):c.4270C>T (p.Leu1424Phe)	GRIN2B	L1424F	Mental retardation, autosomal dominant 6|Epileptic encephalopathy, early infantile, 27	Uncertain significance(Last reviewed: Jul 27, 2018)	criteria provided, single submitter	VCV000660295	12	13715902	12	13562968	660295	640993	rs748128078
NM_000834.5(GRIN2B):c.4286C>T (p.Pro1429Leu)	GRIN2B	P1429L	Mental retardation, autosomal dominant 6|Epileptic encephalopathy, early infantile, 27	Uncertain significance(Last reviewed: Sep 8, 2020)	criteria provided, single submitter	VCV001004477	12	13715886	12	13562952	1004477	995059
NM_000834.4(GRIN2B):c.4288G>C (p.Val1430Leu)	GRIN2B	V1430L	not specified	Uncertain significance(Last reviewed: Dec 3, 2015)	criteria provided, single submitter	VCV000245623	12	13715884	12	13562950	245623	244774	rs879253885
NM_000834.4(GRIN2B):c.4292T>C (p.Val1431Ala)	GRIN2B	V1431A	not provided	Uncertain significance(Last reviewed: Oct 9, 2017)	criteria provided, single submitter	VCV000452641	12	13715880	12	13562946	452641	444946	rs1555101581
NM_000834.4(GRIN2B):c.4307G>C (p.Gly1436Ala)	GRIN2B	G1436A	Mental retardation, autosomal dominant 6|Epileptic encephalopathy, early infantile, 27|Epileptic encephalopathy, early infantile, 27	Uncertain significance(Last reviewed: Oct 7, 2019)	criteria provided, multiple submitters, no conflicts	VCV000569867	12	13715865	12	13562931	569867	566731	rs1565452616
NM_000834.4(GRIN2B):c.4309_4310delinsAT (p.Ala1437Ile)	GRIN2B	A1437I	Epileptic encephalopathy, early infantile, 27|Mental retardation, autosomal dominant 6	Likely benign(Last reviewed: Jun 1, 2019)	criteria provided, single submitter	VCV000765967	12	13715862 - 13715863	12	13562928 - 13562929	765967	769021	rs1591604894
NM_000834.4(GRIN2B):c.4309G>A (p.Ala1437Thr)	GRIN2B	A1437T	not specified	Uncertain significance(Last reviewed: Jul 18, 2014)	criteria provided, single submitter	VCV000211124	12	13715863	12	13562929	211124	207943	rs797045608
NM_000834.5(GRIN2B):c.4310C>T (p.Ala1437Val)	GRIN2B	A1437V	Mental retardation, autosomal dominant 6|Epileptic encephalopathy, early infantile, 27	Uncertain significance(Last reviewed: Mar 5, 2020)	criteria provided, single submitter	VCV000862667	12	13715862	12	13562928	862667	839697
NM_000834.4(GRIN2B):c.4312G>A (p.Val1438Met)	GRIN2B	V1438M	not provided|Mental retardation, autosomal dominant 6|Epileptic encephalopathy, early infantile, 27	Uncertain significance(Last reviewed: Sep 10, 2020)	criteria provided, multiple submitters, no conflicts	VCV000245764	12	13715860	12	13562926	245764	244772	rs763699668
NM_000834.4(GRIN2B):c.4315C>G (p.Pro1439Ala)	GRIN2B	P1439A	Epilepsy, focal, with speech disorder and with or without mental retardation	Uncertain significance(Last reviewed: Nov 16, 2016)	criteria provided, single submitter	VCV000375537	12	13715857	12	13562923	375537	362338	rs758042475
NM_000834.5(GRIN2B):c.4316C>T (p.Pro1439Leu)	GRIN2B	P1439L	Inborn genetic diseases	Uncertain significance(Last reviewed: Jun 7, 2018)	criteria provided, single submitter	VCV000986097	12	13715856	12	13562922	986097	973831
NM_000834.5(GRIN2B):c.4319C>G (p.Ala1440Gly)	GRIN2B	A1440G	Intellectual disability	Likely benign(Last reviewed: Jan 1, 2019)	no assertion criteria provided	VCV000975554	12	13715853	12	13562919	975554	963748
NM_000834.5(GRIN2B):c.4321C>T (p.Arg1441Cys)	GRIN2B	R1441C	Mental retardation, autosomal dominant 6|Epileptic encephalopathy, early infantile, 27	Uncertain significance(Last reviewed: Apr 8, 2019)	criteria provided, single submitter	VCV000855102	12	13715851	12	13562917	855102	839696
NM_000834.4(GRIN2B):c.4322G>A (p.Arg1441His)	GRIN2B	R1441H	Mental retardation, autosomal dominant 6|Epileptic encephalopathy, early infantile, 27|not specified	Conflicting interpretations of pathogenicity(Last reviewed: Dec 19, 2017)	criteria provided, conflicting interpretations	VCV000506431	12	13715850	12	13562916	506431	504233	rs200903876
NM_000834.4(GRIN2B):c.4326C>G (p.Phe1442Leu)	GRIN2B	F1442L	Mental retardation, autosomal dominant 6|Epileptic encephalopathy, early infantile, 27	Uncertain significance(Last reviewed: Mar 15, 2018)	criteria provided, single submitter	VCV000581950	12	13715846	12	13562912	581950	567926	rs1565452565
NM_000834.5(GRIN2B):c.4330A>G (p.Lys1444Glu)	GRIN2B	K1444E	Epileptic encephalopathy, early infantile, 27|Mental retardation, autosomal dominant 6	Uncertain significance(Last reviewed: Oct 1, 2020)	criteria provided, single submitter	VCV001039906	12	13715842	12	13562908	1039906	1030817
NM_000834.4(GRIN2B):c.4355C>T (p.Ser1452Phe)	GRIN2B	S1452F	not provided	Uncertain significance(Last reviewed: Jan 8, 2015)	criteria provided, single submitter	VCV000205725	12	13715817	12	13562883	205725	202651	rs756790727
NM_000834.5(GRIN2B):c.4375A>G (p.Asn1459Asp)	GRIN2B	N1459D	Epileptic encephalopathy, early infantile, 27|Mental retardation, autosomal dominant 6	Uncertain significance(Last reviewed: Nov 18, 2019)	criteria provided, single submitter	VCV000847028	12	13715797	12	13562863	847028	839695
NM_000834.5(GRIN2B):c.4390G>C (p.Ala1464Pro)	GRIN2B	A1464P	Epileptic encephalopathy, early infantile, 27|Mental retardation, autosomal dominant 6	Uncertain significance(Last reviewed: Nov 6, 2019)	criteria provided, single submitter	VCV000954907	12	13715782	12	13562848	954907	947919
NM_000834.4(GRIN2B):c.4400G>C (p.Gly1467Ala)	GRIN2B	G1467A	not provided	Uncertain significance(Last reviewed: Dec 22, 2014)	criteria provided, single submitter	VCV000205726	12	13715772	12	13562838	205726	202650	rs200127692
NM_000834.4(GRIN2B):c.4416T>G (p.His1472Gln)	GRIN2B	H1472Q	Mental retardation, autosomal dominant 6|Epileptic encephalopathy, early infantile, 27	Likely benign(Last reviewed: Nov 22, 2017)	criteria provided, single submitter	VCV000544239	12	13715756	12	13562822	544239	527544	rs1555101497
NM_000834.4(GRIN2B):c.4432T>C (p.Ser1478Pro)	GRIN2B	S1478P	Mental retardation, autosomal dominant 6|Epileptic encephalopathy, early infantile, 27	Uncertain significance(Last reviewed: Mar 16, 2018)	criteria provided, single submitter	VCV000579758	12	13715740	12	13562806	579758	567923	rs910793751
NM_000834.5(GRIN2B):c.4437del (p.Ser1479fs)	GRIN2B	S1479fs	Mental retardation, autosomal dominant 6|Epileptic encephalopathy, early infantile, 27	Uncertain significance(Last reviewed: Feb 22, 2019)	criteria provided, single submitter	VCV000856799	12	13715735	12	13562801	856799	839694

## Sheet: CFERV (additional mutations)
Additional from the CFERV mutations which did not appear on ClinVar
Gene	Protein change	cDNA change	Pheynotpe	Pubmed ID
GRIN2B	p.Ile50Asn	c.149T>A	SCZ	22833210
GRIN2B	p.Leu362Met	c.1084C>A	SCZ	22833210; 21383861
GRIN2B	p.Asp524Asn	c.1570G>A	ID	27479843
GRIN2B	p.Gln621Ter	c.1861	N.A	26350204
GRIN2B	p.Ala636Val	c.1907C>T	ID; EPI; MC; CVI	27839871; 28377535
GRIN2B	p.Gly684Arg	c.2050	N.A	26350204
GRIN2B	p.Gly684Glu	c.2051	N.A	26350204
GRIN2B	p.Ser690Asn	c.2069	N.A	26350204
GRIN2B	p.Met789Lys	c.2577T>A	ASD	21383861
GRIN2B	p.Phe1011Leu	c.3033	N.A	26350204
GRIN2B	p.Ser1415Ter	c.4244delC	DD; HPT; EPI	CFERV
GRIN2B	p.Ile1446Thr	c.4337	N.A	26350204
CVI - cerebral visual impairment
DD - developmental delay
EPI - epilepsy
HPT - hypotonia
ID - intellectual disability
N.A - not available
SCZ - schizophrenia
