# Supplementary figures and images for: Two de novo GluN2B mutations affect multiple NMDAR-functions and instigate severe pediatric encephalopathy
Source: eLife journal article supplement (doi:10.7554/elife.67555), 2021-07-02

a

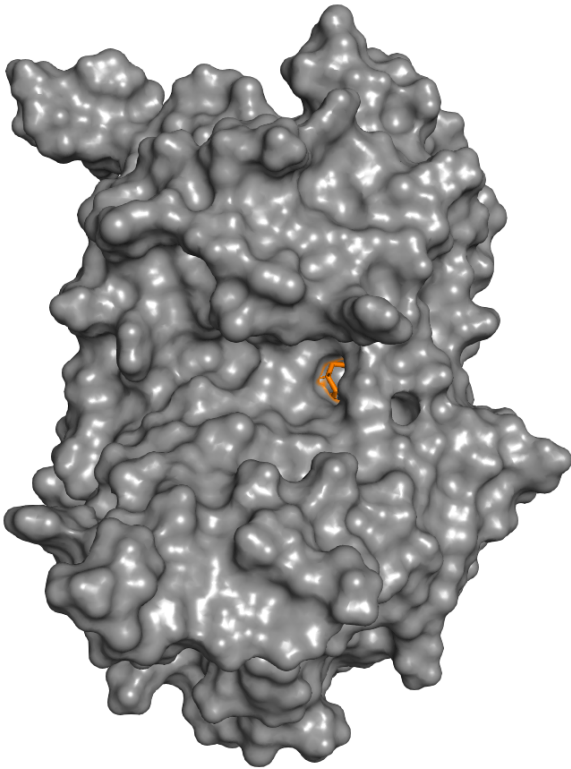

b

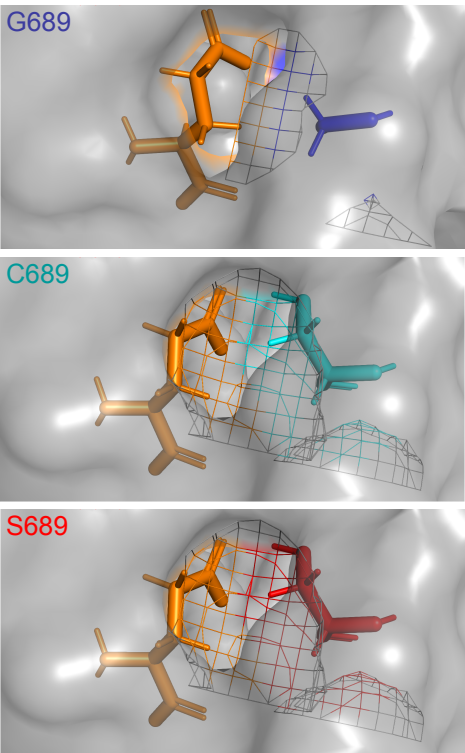

Supplement: supp [file elife-67555-supp-v1.zip]

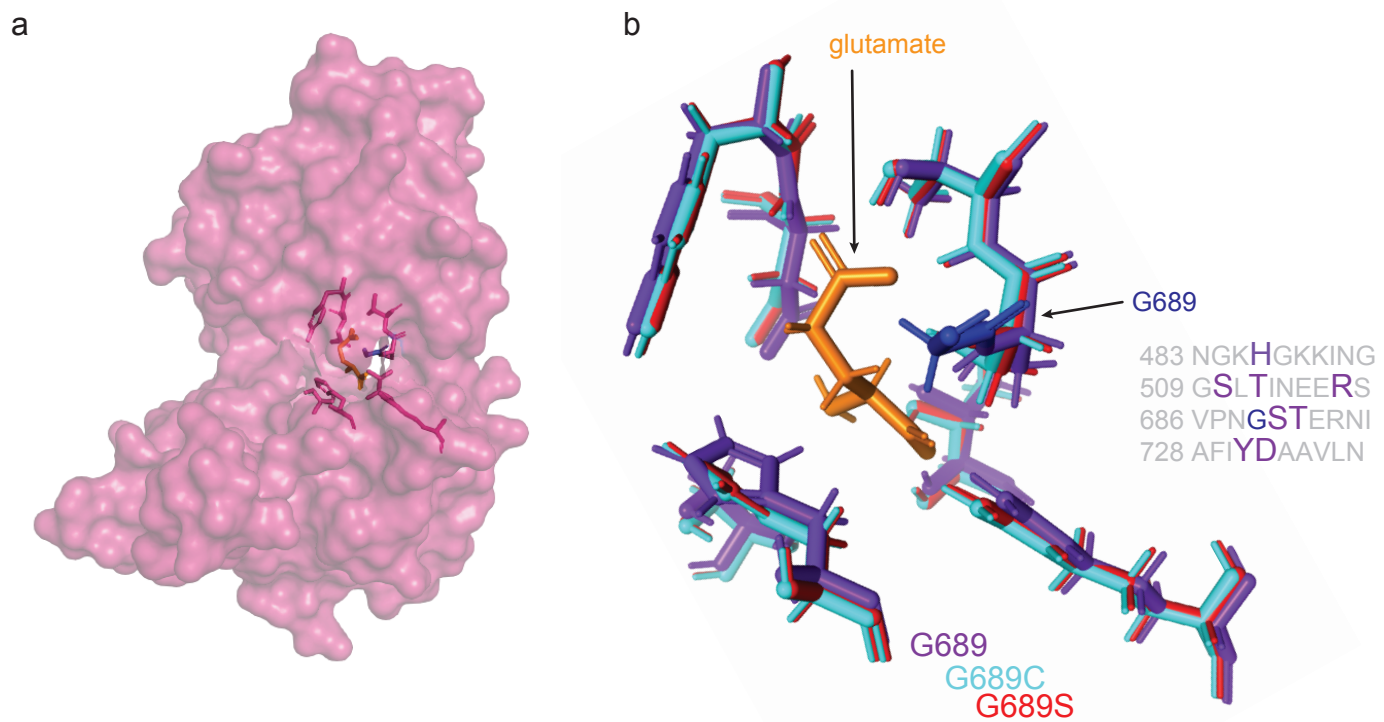

Supplement: supp [file elife-67555-supp-v1.zip]

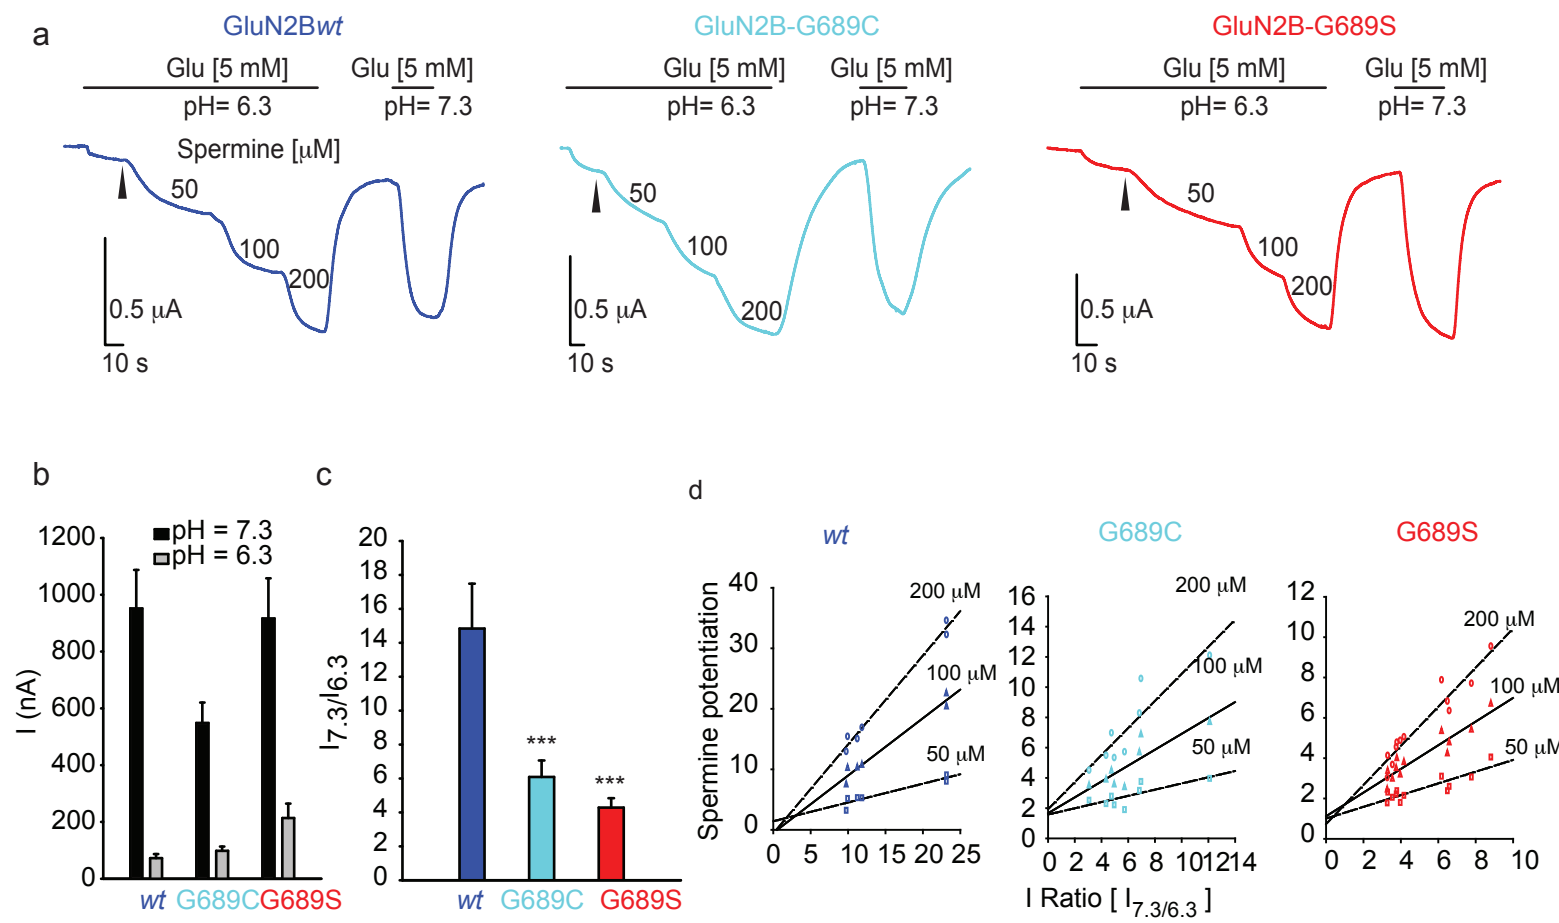

Supplement: supp [file elife-67555-supp-v1.zip]

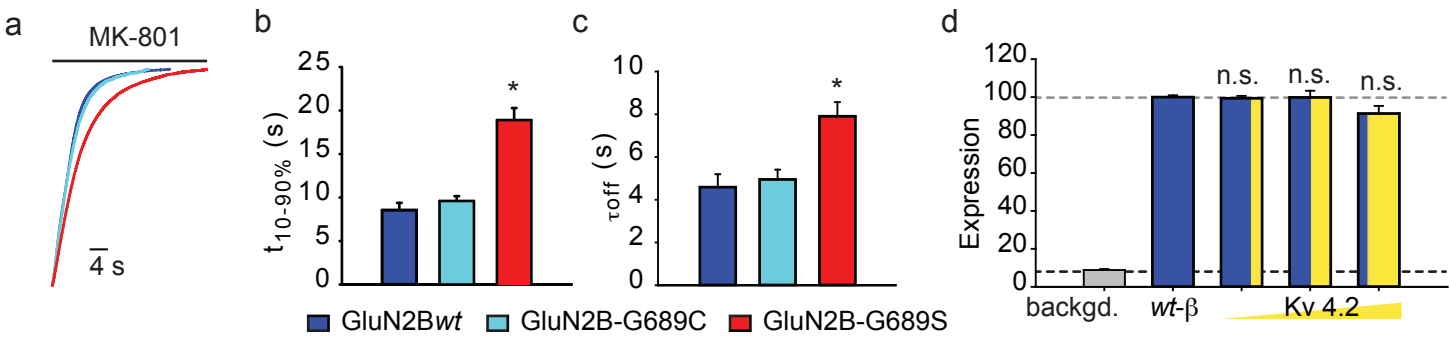

Supplement: supp [file elife-67555-supp-v1.zip]

a

| Mutation (G689X) | Polarity | Hydrophobicity | Volume | $\Delta\Delta G$ |
|------------------|----------|----------------|--------|------------------|
| E                | 12.3     | 0.86           | 90.4   | -2.541           |
| D                | 13       | 0.96           | 74.1   | -2.483           |
| W                | 5.4      | -9.63          | 144.1  | -1.606           |
| Q                | 10.5     | 1.21           | 93.9   | -1.592           |
| G689C            | 5.5      | 0.69           | 72.5   | -1.42            |
| T                | 8.6      | 0.59           | 77.1   | -1.366           |
| G689S            | 9.2      | 0.76           | 60.8   | -1.355           |
| F                | 5.2      | -17.28         | 121.3  | -1.307           |
| N                | 11.6     | 1.17           | 78     | -1.283           |
| K                | 11.3     | 0.92           | 108.5  | -1.282           |
| Y                | 6.2      | -15.09         | 123.6  | -1.194           |
| H                | 10.4     | 1.03           | 99.3   | -1.07            |
| R                | 10.5     | 1.03           | 111.5  | -0.863           |
| A                | 8.1      | 0.96           | 60.6   | -0.746           |
| V                | 8        | -0.49          | 81     | -0.568           |
| P                | 5.9      | -3.74          | 91.3   | -0.568           |
| L                | 4.9      | -21.91         | 107.5  | -0.53            |
| I                | 5.2      | -15.16         | 107.5  | -0.53            |
| M                | 5.7      | -3.01          | 105.1  | -0.512           |

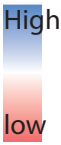

Supplement: supp [file elife-67555-supp-v1.zip]

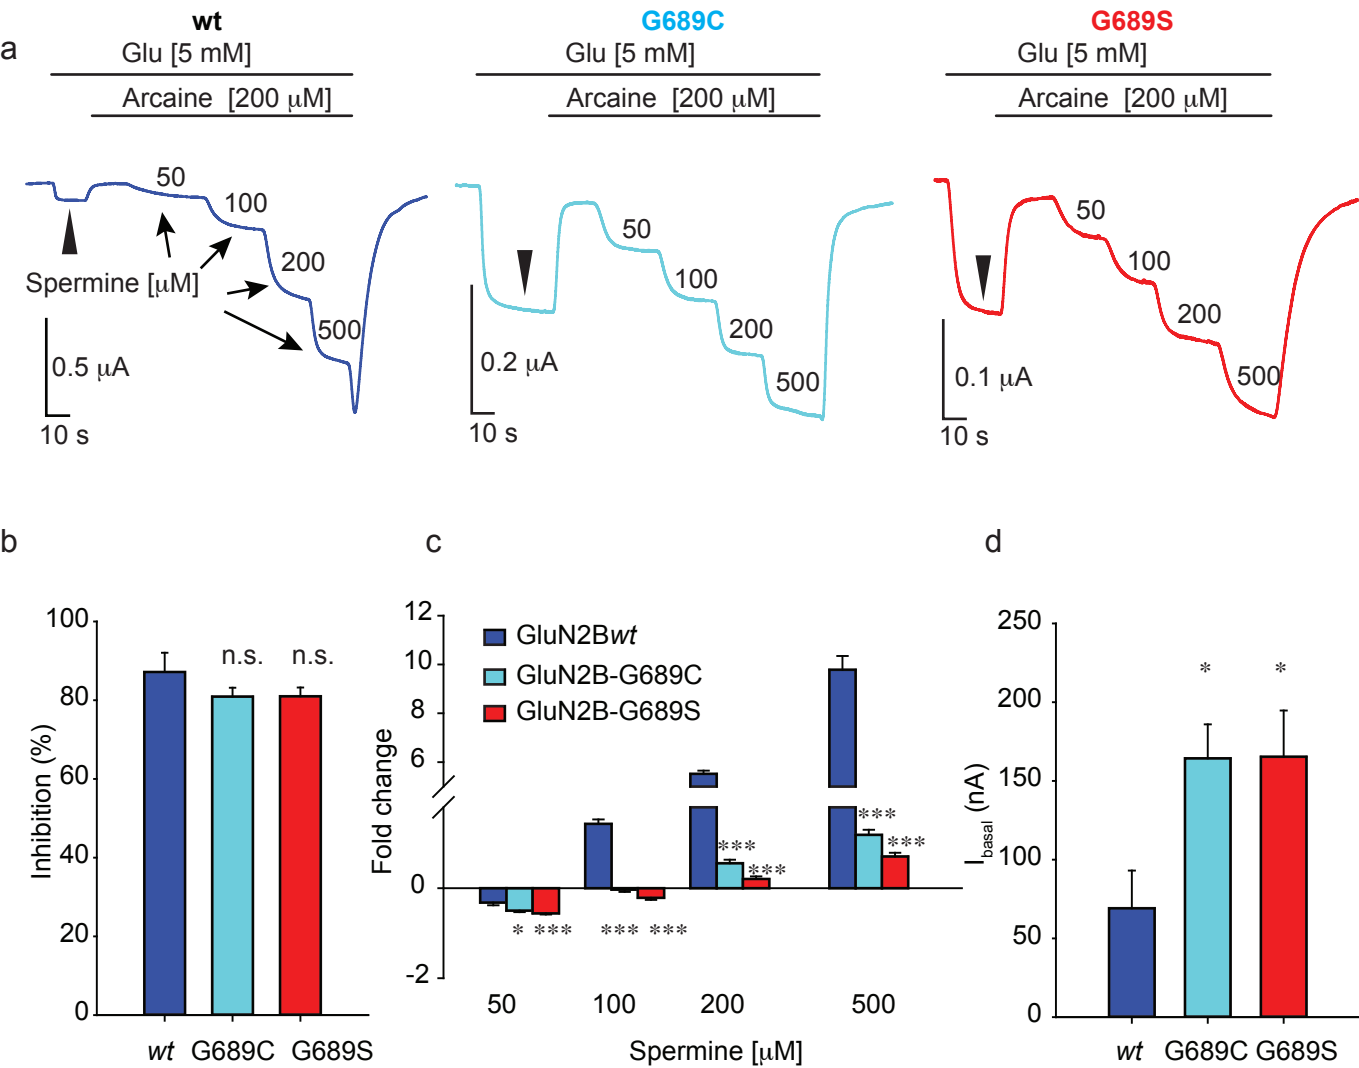

Supplement: supp [file elife-67555-supp-v1.zip]

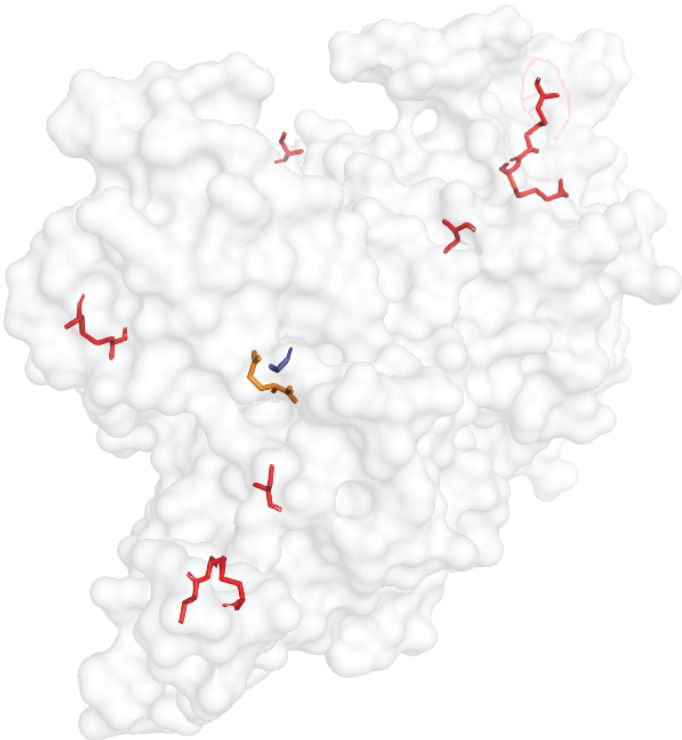

Supplement: supp [file elife-67555-supp-v1.zip]

a

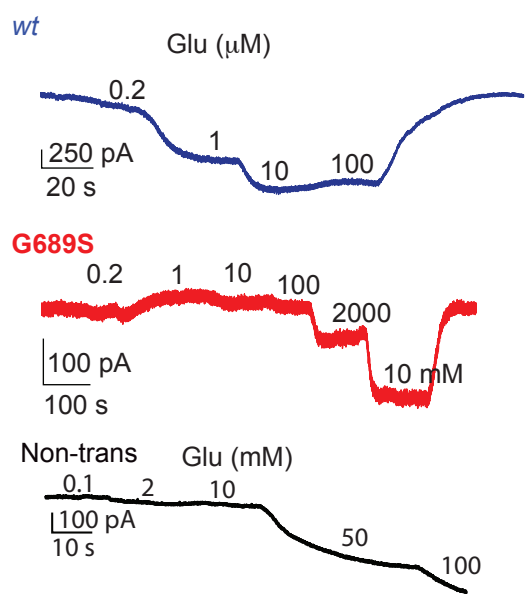

b

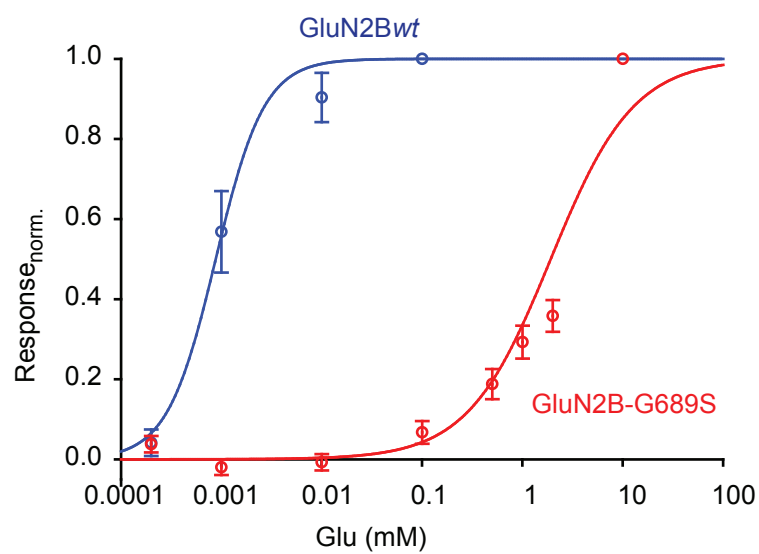

Supplement: supp [file elife-67555-supp-v1.zip]

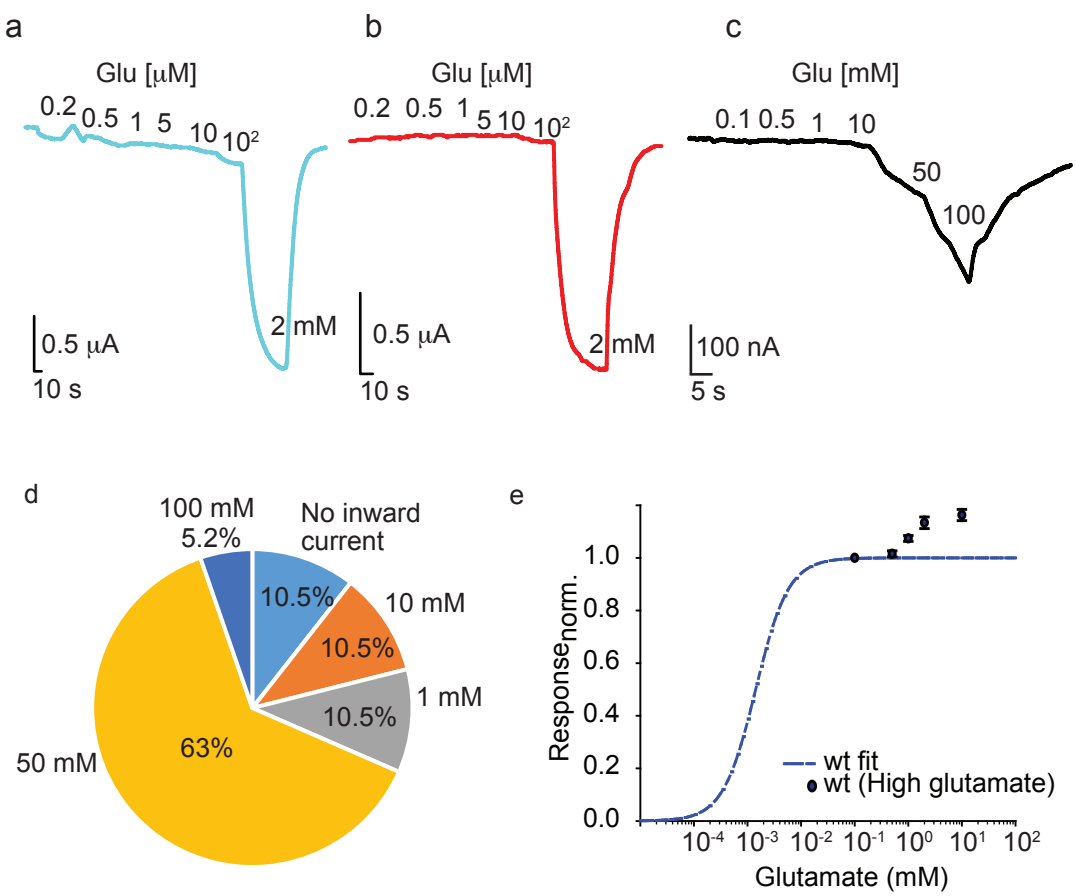

Supplement: supp [file elife-67555-supp-v1.zip]

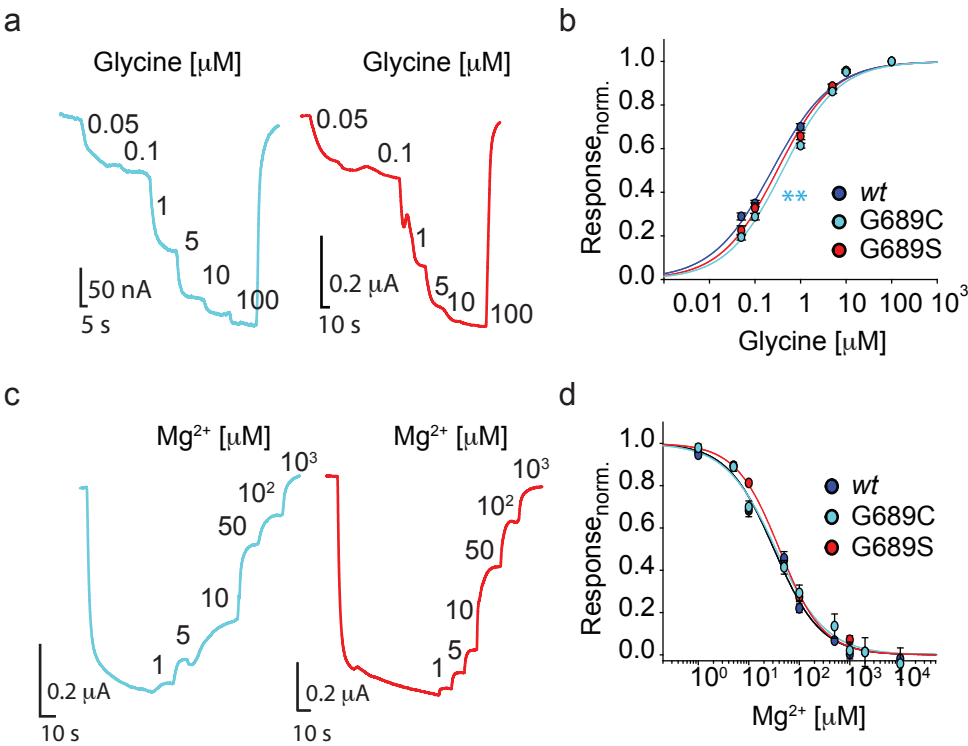

Supplement: supp [file elife-67555-supp-v1.zip]

a

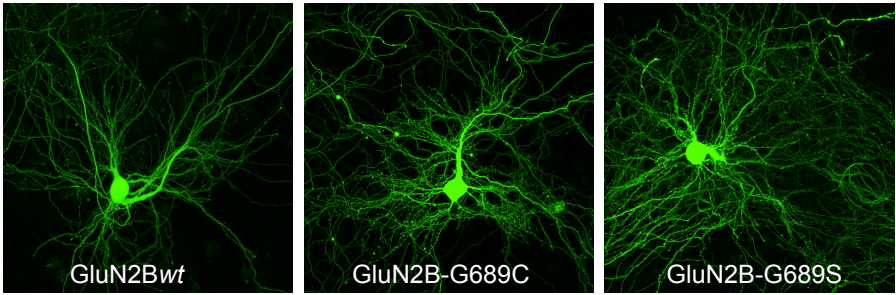

b

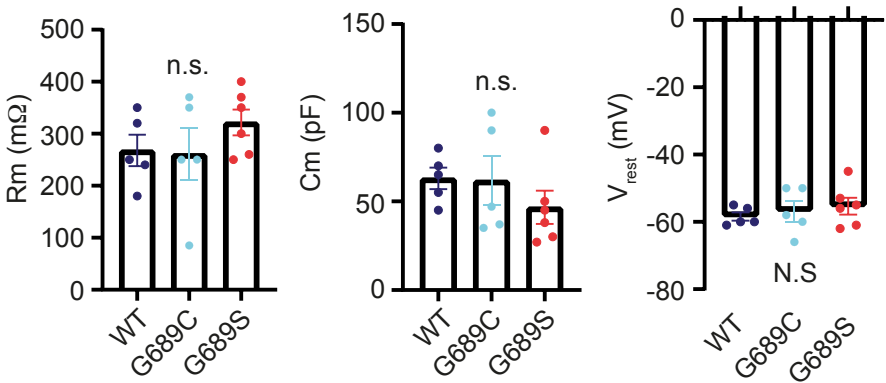

c

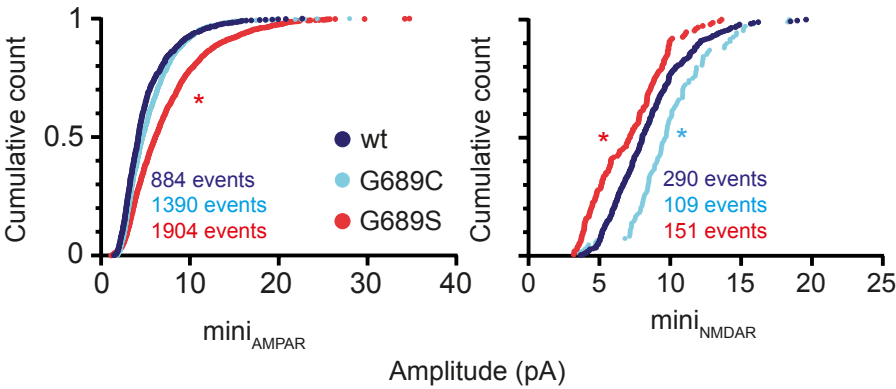

Supplement: supp [file elife-67555-supp-v1.zip]
